# Supplementary material
Source: MDPI journal article supplement (https://www.mdpi.com/2624-8549/5/2/63)
Supplement: s1 [file s1]

Supplementary Material for the paper entitled:

## **Stabilization of 2-pyridyltellurium(II) derivatives by oxidorhenium(V) complexes**

*Felipe Dornelles da Silva,<sup>1</sup> Maximilian Roca Jungfer,<sup>2</sup> Adelheid Hagenbach,<sup>2</sup> Ernesto Schulz Lang<sup>1\*</sup>, and Ulrich Abram<sup>2\*</sup>*

<sup>1</sup> Universidade Federal de Santa Maria, Department of Chemistry, Avenida Roraima, nº 1000, Santa Maria, Rio Grande do Sul, Brazil.  
E-mail: eslang@ufsm.br

<sup>2</sup> Freie Universität Berlin, Institute of Chemistry and Biochemistry, Fabeckstr. 34/36, 14195 Berlin, Germany  
E-mail: ulrich.abram@fu-berlin.de

|                                                                                                                                                                                                                                                                                                                        |           |
|------------------------------------------------------------------------------------------------------------------------------------------------------------------------------------------------------------------------------------------------------------------------------------------------------------------------|-----------|
| <b>1. Crystallographic data</b>                                                                                                                                                                                                                                                                                        | <b>4</b>  |
| <b>Table S1.</b> Crystallographic data and data collection parameters                                                                                                                                                                                                                                                  | 4         |
| <b>Figure S1.</b> Structure of (CF <sub>3</sub> pyTe) <sub>2</sub> ( <b>1</b> ). Ellipsoid plot with thermal ellipsoids representing 50 per cent probability and unit cell plot illustrating secondary Te...Te bonds of 3.802 Å, intermolecular Te...N contacts of 3.270 Å and a weak intermolecular H bond of 2.590 Å | 7         |
| <b>Table S2.</b> Selected bond lengths (Å) and angles (°) in (CF <sub>3</sub> pyTe) <sub>2</sub> ( <b>1</b> ).                                                                                                                                                                                                         | 7         |
| <b>Figure S2.</b> Ellipsoid representation of the molecular structure of (HCF <sub>3</sub> py)TeCl <sub>2</sub> ( <b>2</b> ). Thermal ellipsoids represent 50 per cent probability                                                                                                                                     | 7         |
| <b>Table S3.</b> Selected bond lengths (Å) and angles (°) in (HCF <sub>3</sub> py)TeCl <sub>2</sub> ( <b>2</b> ).                                                                                                                                                                                                      | 7         |
| <b>Figure S3.</b> Ellipsoid representation of the molecular structure of (HCF <sub>3</sub> py)TeBr <sub>2</sub> ( <b>3</b> ). Thermal ellipsoids represent 50 per cent probability                                                                                                                                     | 8         |
| <b>Table S4.</b> Selected bond lengths (Å) and angles (°) in (HCF <sub>3</sub> py)TeBr <sub>2</sub> ( <b>3</b> ).                                                                                                                                                                                                      | 8         |
| <b>Figure S4.</b> 'Long-range' Te-Br interactions in (HCF <sub>3</sub> py)TeBr <sub>2</sub> ( <b>3</b> ).                                                                                                                                                                                                              | 8         |
| <b>Figure S5.</b> Ellipsoid representation of the molecular structure of [ReO <sub>2</sub> Cl(pyTeCl)(PPh <sub>3</sub> ) <sub>2</sub> ] ( <b>5</b> ). Thermal ellipsoids represent 50 per cent probability.                                                                                                            | 9         |
| <b>Table S5.</b> Selected bond lengths (Å) and angles (°) in [ReO <sub>2</sub> Cl(pyTeCl)(PPh <sub>3</sub> ) <sub>2</sub> ] ( <b>5</b> ).                                                                                                                                                                              | 9         |
| <b>Figure S6.</b> Ellipsoid representation of the molecular structure of [ReO <sub>2</sub> Cl(CF <sub>3</sub> pyTeCl)(PPh <sub>3</sub> ) <sub>2</sub> ] ( <b>4</b> ) x 3 DMF. Thermal ellipsoids represent 50 per cent probability                                                                                     | 10        |
| <b>Table S6.</b> Selected bond lengths (Å) and angles (°) in [ReO <sub>2</sub> Cl(CF <sub>3</sub> pyTeCl)(PPh <sub>3</sub> ) <sub>2</sub> ] ( <b>4</b> ).                                                                                                                                                              | 10        |
| <b>2. Spectroscopic Data</b>                                                                                                                                                                                                                                                                                           | <b>11</b> |
| <b>Figure S7.</b> IR spectrum of bis(5-trifluoromethyl-2-pyridyl)ditellane ( <b>1</b> ).                                                                                                                                                                                                                               | 11        |
| <b>Figure S8.</b> Raman spectrum of bis(5-trifluoromethyl-2-pyridyl)ditellane ( <b>1</b> ).                                                                                                                                                                                                                            | 11        |
| <b>Figure S9.</b> <sup>1</sup> H NMR spectrum of bis(5-trifluoromethyl-2-pyridyl)ditellane ( <b>1</b> ) in CDCl <sub>3</sub>                                                                                                                                                                                           | 12        |
| <b>Figure S10.</b> <sup>13</sup> C NMR spectrum of bis(5-trifluoromethyl-2-pyridyl)ditellane ( <b>1</b> ) in CDCl <sub>3</sub>                                                                                                                                                                                         | 12        |
| <b>Figure S11.</b> <sup>19</sup> F NMR spectrum of bis(5-trifluoromethyl-2-pyridyl)ditellane ( <b>1</b> ) in CDCl <sub>3</sub>                                                                                                                                                                                         | 13        |
| <b>Figure S12.</b> <sup>125</sup> Te NMR spectrum of bis(5-trifluoromethyl-2-pyridyl)ditellane ( <b>1</b> ) in CDCl <sub>3</sub>                                                                                                                                                                                       | 13        |
| <b>Figure S13.</b> IR spectrum of (HCF <sub>3</sub> py)TeCl <sub>2</sub> ( <b>2</b> ).                                                                                                                                                                                                                                 | 14        |
| <b>Figure S14.</b> Raman spectrum of (CF <sub>3</sub> pyH)TeCl <sub>2</sub> ( <b>2</b> ).                                                                                                                                                                                                                              | 14        |
| <b>Figure S15.</b> IR spectrum of (HCF <sub>3</sub> py)TeBr <sub>2</sub> ( <b>3</b> ).                                                                                                                                                                                                                                 | 15        |
| <b>Figure S16.</b> Raman spectrum of (HCF <sub>3</sub> py)TeBr <sub>2</sub> ( <b>3</b> ).                                                                                                                                                                                                                              |           |
| <b>Figure S17.</b> IR spectrum of [ReO <sub>2</sub> Cl(CF <sub>3</sub> pyTeCl)(PPh <sub>3</sub> ) <sub>2</sub> ] ( <b>4</b> ).                                                                                                                                                                                         | 16        |
| <b>Figure S18.</b> Raman spectrum of [ReO <sub>2</sub> Cl(CF <sub>3</sub> pyTeCl)(PPh <sub>3</sub> ) <sub>2</sub> ] ( <b>4</b> ).                                                                                                                                                                                      | 16        |
| <b>Figure S19.</b> <sup>19</sup> F NMR spectrum of [ReO <sub>2</sub> Cl(CF <sub>3</sub> pyTeCl)(PPh <sub>3</sub> ) <sub>2</sub> ] ( <b>4</b> ).                                                                                                                                                                        | 17        |
| <b>Figure S20.</b> <sup>31</sup> P NMR spectrum of [ReO <sub>2</sub> Cl(CF <sub>3</sub> pyTeCl)(PPh <sub>3</sub> ) <sub>2</sub> ] ( <b>4</b> ).                                                                                                                                                                        | 17        |
| <b>Figure S21.</b> IR spectrum of [ReO <sub>2</sub> Cl(pyTeCl)(PPh <sub>3</sub> ) <sub>2</sub> ] ( <b>5</b> ).                                                                                                                                                                                                         | 18        |
| <b>Figure S22.</b> Raman spectrum of [ReO <sub>2</sub> Cl(pyTeCl)(PPh <sub>3</sub> ) <sub>2</sub> ] ( <b>5</b> ).                                                                                                                                                                                                      | 18        |
| <b>Figure S23.</b> <sup>31</sup> P NMR spectrum of [ReO <sub>2</sub> Cl(pyTeCl)(PPh <sub>3</sub> ) <sub>2</sub> ] ( <b>5</b> ).                                                                                                                                                                                        | 19        |
| <b>Figure S24.</b> <sup>125</sup> Te NMR spectrum of [ReO <sub>2</sub> Cl(pyTeCl)(PPh <sub>3</sub> ) <sub>2</sub> ] ( <b>5</b> ).                                                                                                                                                                                      | 19        |
| <b>3. Computational Chemistry</b>                                                                                                                                                                                                                                                                                      | <b>20</b> |
| <b>Table S7.</b> Results of the charge analysis for selected atoms in [ReO <sub>2</sub> Cl(pyTeCl)(PPh <sub>3</sub> ) <sub>2</sub> ] ( <b>5</b> ). Wiberg bond order matrix for selected atoms, relevant bond orders are bold                                                                                          | 20        |
| <b>Table S8.</b> Lone-pair decomposition of Re and Te in [ReO <sub>2</sub> Cl(pyTeCl)(PPh <sub>3</sub> ) <sub>2</sub> ] ( <b>5</b> ).                                                                                                                                                                                  | 20        |
| <b>Table S9.</b> Natural electron configuration of selected atoms in [ReO <sub>2</sub> Cl(pyTeCl)(PPh <sub>3</sub> ) <sub>2</sub> ] ( <b>5</b> ).                                                                                                                                                                      | 20        |
| <b>Table S10.</b> Selected parameters from the second order perturbation analysis of [ReO <sub>2</sub> Cl(pyTeCl)(PPh <sub>3</sub> ) <sub>2</sub> ] ( <b>5</b> ). Delocalization, which was interpreted as an ionic bond is bold.                                                                                      | 21        |
| <b>Table S11.</b> Three-centered <i>trans</i> -bonds around Re (3c4e hyper-bonds) in [ReO <sub>2</sub> Cl(pyTeCl)(PPh <sub>3</sub> ) <sub>2</sub> ] ( <b>5</b> ).                                                                                                                                                      | 21        |
| <b>Figure S25.</b> Donation of lone pair 1 (LP1) of O2 into empty valence orbital 1 (LV1) of Re and Te in [ReO <sub>2</sub> Cl(pyTeCl)(PPh <sub>3</sub> ) <sub>2</sub> ] ( <b>5</b> ) based on the NBO analysis. The isosurfaces are shown with an isosurface value of 0.08                                            | 21        |
| <b>Figure S26.</b> Donation of lone pair 2 (LP2) of O2 into empty valence orbital 1 (LV1) of Re and Te in                                                                                                                                                                                                              |           |

|                                                                                                                                                                                                                                                                                                                                                                                                                                                                                                                                                                                         |           |
|-----------------------------------------------------------------------------------------------------------------------------------------------------------------------------------------------------------------------------------------------------------------------------------------------------------------------------------------------------------------------------------------------------------------------------------------------------------------------------------------------------------------------------------------------------------------------------------------|-----------|
| [ReO <sub>2</sub> Cl(pyTeCl)(PPh <sub>3</sub> ) <sub>2</sub> ] ( <b>5</b> ) based on the NBO analysis. The isosurfaces are shown with an isosurface value of 0.08.....                                                                                                                                                                                                                                                                                                                                                                                                                  | 22        |
| <b>Figure S27.</b> Donation of lone pair 4 (LP4) of O2 into empty valence orbital 1 (LV1) of Re and Te in [ReO <sub>2</sub> Cl(pyTeCl)(PPh <sub>3</sub> ) <sub>2</sub> ] ( <b>5</b> ) based on the NBO analysis. The isosurfaces are shown with an isosurface value of 0.08.....                                                                                                                                                                                                                                                                                                        | 22        |
| <b>Figure S28.</b> Donation of lone pair 3 (LP3) of O2 into the antibonding Re-O1 orbital of [ReO <sub>2</sub> Cl(pyTeCl)(PPh <sub>3</sub> ) <sub>2</sub> ] ( <b>5</b> ) based on the NBO analysis. LV1 of Te is also shown to visualize the orthogonality of the two orbitals and the absence of donation of LP3 of O2 into this orbital. The isosurfaces are shown with an isosurface value of 0.08. 23                                                                                                                                                                               |           |
| <b>Figure S29.</b> Interbasin surfaces of Re-O2 and Te-O2 contacts in [ReO <sub>2</sub> Cl(pyTeCl)(PPh <sub>3</sub> ) <sub>2</sub> ] ( <b>5</b> ). .....                                                                                                                                                                                                                                                                                                                                                                                                                                | 23        |
| <b>Figure S30.</b> Basins of Re and Te in [ReO <sub>2</sub> Cl(pyTeCl)(PPh <sub>3</sub> ) <sub>2</sub> ] ( <b>5</b> ) with mapping of the electron density at the 0.06 isosurface value. The electron density at the surface is a measure of the bond strength .....                                                                                                                                                                                                                                                                                                                    | 24        |
| <b>Figure S31.</b> Basins of O2 and the superposition of Re, Te and O2 basins in [ReO <sub>2</sub> Cl(pyTeCl)(PPh <sub>3</sub> ) <sub>2</sub> ] ( <b>5</b> ) with mapping of the electron density at the 0.06 isosurface value. The electron density at the surface is a measure of the bond strength.....                                                                                                                                                                                                                                                                              | 24        |
| <b>Table S12.</b> Selected properties of the electron density at important bond critical points in [ReO <sub>2</sub> Cl(pyTeCl)(PPh <sub>3</sub> ) <sub>2</sub> ] ( <b>5</b> ). .....                                                                                                                                                                                                                                                                                                                                                                                                   | 24        |
| <b>Figure S32.</b> ELF with bond paths (black) in [ReO <sub>2</sub> Cl(pyTeCl)(PPh <sub>3</sub> ) <sub>2</sub> ] ( <b>5</b> ). Cuts through a) the C=N bond in z direction to the pyridine plane, b) the O N contact in z direction to the pyridine plane, c) the Re-N dative bond in z direction to the pyridine plane, c) the Re-O bond in z direction to the pyridine plane or along the Re-P-O plane, e) the Re Te contact in z direction to the pyridine plane, f) the Te-C bond in z direction to the pyridine plane, g) the Te-O bond in z direction to the pyridine plane ..... | 25        |
| <b>Figure S33.</b> Laplacian map of the electron density in [ReO <sub>2</sub> Cl(pyTeCl)(PPh <sub>3</sub> ) <sub>2</sub> ] ( <b>5</b> ) (blue = negative; red = positive) with negative values corresponding to local electronic charge accumulation while positive values indicate regions of local electronic charge depletion. Cut through the Re Te contact in z direction to the pyridine plane.....                                                                                                                                                                               | 25        |
| <b>Figure S34.</b> 3D Laplacian map of the electron density at the 0 (enclosure) level in [ReO <sub>2</sub> Cl(pyTeCl)(PPh <sub>3</sub> ) <sub>2</sub> ] ( <b>5</b> ) showing regions of electronic charge accumulation .....                                                                                                                                                                                                                                                                                                                                                           | 25        |
| <b>Figure S35.</b> Gradient vector field of the electron density cut through the respective Te-O (left) and O-Re (right) bonds perpendicular to the Re-O-Te plane in [ReO <sub>2</sub> Cl(pyTeCl)(PPh <sub>3</sub> ) <sub>2</sub> ] ( <b>5</b> ) mapped on the electron density iso contour lines with topological descriptors. (3,-3) = brown, (3,-1) = blue, (3,1) = orange, bond path between (3,-3) and (3,-1) critical points = cyan. Additionally, a contour line of the van der Waals radius (black) is shown .....                                                              | 26        |
| <b>S4. References .....</b>                                                                                                                                                                                                                                                                                                                                                                                                                                                                                                                                                             | <b>26</b> |

# 1. Crystallographic data

The intensities for the X-ray determinations were collected on a STOE IPDS 2T or a Bruker Apex-II CCD with Mo K $\alpha$  or Ag K $\alpha$  radiation. The space groups were determined by the detection of systematical absences. Absorption corrections were carried out by integration methods or SADABS.[1,2]. Structure solution and refinement were performed with the SHELX program package on the OLEX-2 platform [3-5]. Hydrogen atoms were derived from the final Fourier maps and refined or placed at calculated positions and treated with the 'riding model' option of SHELXL. The representation of molecular structures was done using the program DIAMOND 4.2.2 [6].

**Table S1:** Crystallographic data and data collection parameters

|                                             | (CF <sub>3</sub> pyTe) <sub>2</sub><br>(1)                                   | [HCF <sub>3</sub> pyTeCl <sub>2</sub> ]<br>(2)                   |
|---------------------------------------------|------------------------------------------------------------------------------|------------------------------------------------------------------|
| Empirical formula                           | C <sub>12</sub> H <sub>6</sub> F <sub>6</sub> N <sub>2</sub> Te <sub>2</sub> | C <sub>6</sub> H <sub>4</sub> Cl <sub>2</sub> F <sub>3</sub> NTe |
| Formula weight                              | 547.39                                                                       | 345.60                                                           |
| Temperature/K                               | 100                                                                          | 293(2)                                                           |
| Crystal system                              | monoclinic                                                                   | trigonal                                                         |
| Space group                                 | P2 <sub>1</sub> /c                                                           | R-3                                                              |
| a/Å                                         | 22.09(1)                                                                     | 21.905(3)                                                        |
| b/Å                                         | 6.006(1)                                                                     | 21.905(3)                                                        |
| c/Å                                         | 11.377(9)                                                                    | 11.071(1)                                                        |
| $\alpha$ /°                                 | 90                                                                           | 90                                                               |
| $\beta$ /°                                  | 100.29(3)                                                                    | 90                                                               |
| $\gamma$ /°                                 | 90                                                                           | 120                                                              |
| Volume/Å <sup>3</sup>                       | 1485(1)                                                                      | 4600(1)                                                          |
| Z                                           | 4                                                                            | 18                                                               |
| $\rho_{\text{calc}}$ / cm <sup>3</sup>      | 2.448                                                                        | 2.245                                                            |
| $\mu$ / mm <sup>-1</sup>                    | 2.082                                                                        | 3.428                                                            |
| F(000)                                      | 1000                                                                         | 2880.0                                                           |
| Crystal size / mm <sup>3</sup>              | 0.35 x 0.30 x 0.25                                                           | 0.4 × 0.4 × 0.2                                                  |
| Radiation                                   | AgK $\alpha$ ( $\lambda$ = 0.56086)                                          | MoK $\alpha$ ( $\lambda$ = 0.71073)                              |
| 2 $\theta$ range for data collection/°      | 4.436 to 47.22                                                               | 9.304 to 49.942                                                  |
| Index ranges                                | -31 ≤ h ≤ 31, -8 ≤ k ≤ 7, -16 ≤ l ≤ 16                                       | -26 ≤ h ≤ 26, -26 ≤ k ≤ 26, -13 ≤ l ≤ 13                         |
| Reflections collected                       | 38240                                                                        | 12174                                                            |
| Independent reflections                     | 4531 [R <sub>int</sub> = 0.0214, R <sub>sigma</sub> = 0.0121]                | 1789 [R <sub>int</sub> = 0.1025, R <sub>sigma</sub> = 0.0555]    |
| Data/restraints/parameters                  | 4531/0/199                                                                   | 1789/0/146                                                       |
| Goodness-of-fit on F <sup>2</sup>           | 1.104                                                                        | 0.971                                                            |
| Final R indexes [I ≥ 2 $\sigma$ (I)]        | R <sub>1</sub> = 0.0170, wR <sub>2</sub> = 0.0393                            | R <sub>1</sub> = 0.0337, wR <sub>2</sub> = 0.0641                |
| Final R indexes [all data]                  | R <sub>1</sub> = 0.0192, wR <sub>2</sub> = 0.0405                            | R <sub>1</sub> = 0.0468, wR <sub>2</sub> = 0.0663                |
| Largest diff. peak/hole / e Å <sup>-3</sup> | 0.62/-0.70                                                                   | 0.61/-1.78                                                       |
| Diffractometer                              | Bruker APEX-II CCD                                                           | STOE IPDS 2T                                                     |
| CCDC access code                            | 2250207                                                                      | 2244435                                                          |

**Table S1(continued):** Crystallographic data and data collection parameters

|                                             | HCF <sub>3</sub> pyTeBr <sub>2</sub> ]<br>(3)                                                | [ReO <sub>2</sub> Cl(pyTeCl)(PPh <sub>3</sub> ) <sub>2</sub> ]<br>(5)              |
|---------------------------------------------|----------------------------------------------------------------------------------------------|------------------------------------------------------------------------------------|
| Empirical formula                           | C <sub>12</sub> H <sub>8</sub> Br <sub>4</sub> F <sub>6</sub> N <sub>2</sub> Te <sub>2</sub> | C <sub>41</sub> H <sub>34</sub> Cl <sub>2</sub> NO <sub>2</sub> ReTeP <sub>2</sub> |
| Formula weight                              | 869.04                                                                                       | 1019.33                                                                            |
| Temperature/K                               | 293(2)                                                                                       | 100(2)                                                                             |
| Crystal system                              | monoclinic                                                                                   | Triclinic                                                                          |
| Space group                                 | C2/c                                                                                         | P-1                                                                                |
| a/Å                                         | 25.199(5)                                                                                    | 9.075(3)                                                                           |
| b/Å                                         | 14.306(3)                                                                                    | 10.843(2)                                                                          |
| c/Å                                         | 9.130(2)                                                                                     | 19.747(5)                                                                          |
| α/°                                         | 90                                                                                           | 89.909(7)                                                                          |
| β/°                                         | 100.12(3)                                                                                    | 88.339(8)                                                                          |
| γ/°                                         | 90                                                                                           | 76.995(8)                                                                          |
| Volume/Å <sup>3</sup>                       | 3239.9(3)                                                                                    | 1892.6(8)                                                                          |
| Z                                           | 6                                                                                            | 2                                                                                  |
| ρ <sub>calc</sub> /g cm <sup>-3</sup>       | 2.672                                                                                        | 1.789                                                                              |
| μ / mm <sup>-1</sup>                        | 10.151                                                                                       | 4.228                                                                              |
| F(000)                                      | 2352.0                                                                                       | 988.0                                                                              |
| Crystal size / mm <sup>3</sup>              | 0.35 × 0.30 × 0.20                                                                           | 015 × 0.08 × 0.03                                                                  |
| Radiation                                   | MoKα (λ = 0.71073)                                                                           | MoKα (λ = 0.71073)                                                                 |
| 2θ range for data collection/°              | 9.682 to 58.71                                                                               | 4.608 to 54.41                                                                     |
| Index ranges                                | -23 ≤ h ≤ 34, -19 ≤ k ≤ 19, -12 ≤ l ≤ 12                                                     | -11 ≤ h ≤ 11, -13 ≤ k ≤ 12, -25 ≤ l ≤ 25                                           |
| Reflections collected                       | 10616                                                                                        | 28044                                                                              |
| Independent reflections                     | 4315 [R <sub>int</sub> = 0.0669, R <sub>sigma</sub> = 0.0664]                                | 8352 [R <sub>int</sub> = 0.0343, R <sub>sigma</sub> = 0.0345]                      |
| Data/restraints/parameters                  | 4315/293/182                                                                                 | 8352/0/451                                                                         |
| Goodness-of-fit on F <sup>2</sup>           | 1.015                                                                                        | 1.055                                                                              |
| Final R indexes [I ≥ 2σ (I)]                | R <sub>1</sub> = 0.0547, wR <sub>2</sub> = 0.1191                                            | R <sub>1</sub> = 0.0229, wR <sub>2</sub> = 0.0502                                  |
| Final R indexes [all data]                  | R <sub>1</sub> = 0.0960, wR <sub>2</sub> = 0.1330                                            | R <sub>1</sub> = 0.0266, wR <sub>2</sub> = 0.0514                                  |
| Largest diff. peak/hole / e Å <sup>-3</sup> | 1.10/-1.27                                                                                   | 1.03/-1.52                                                                         |
| Diffractometer                              | STOE IPDS 2T                                                                                 | Bruker APEX-II CCD                                                                 |
| CCDC access code                            | 2244436                                                                                      | 2244437                                                                            |

**Table S1 (continued):** Crystallographic data and data collection parameters

| [ReO <sub>2</sub> Cl(CF <sub>3</sub> pyTeCl)(PPh <sub>3</sub> ) <sub>2</sub> ] x 3 DMF<br>(4) x 3 DMF |                                                                                                                  |
|-------------------------------------------------------------------------------------------------------|------------------------------------------------------------------------------------------------------------------|
| Empirical formula                                                                                     | C <sub>51</sub> H <sub>54</sub> Cl <sub>2</sub> F <sub>3</sub> N <sub>4</sub> O <sub>5</sub> P <sub>2</sub> ReTe |
| Formula weight                                                                                        | 1306.62                                                                                                          |
| Temperature/K                                                                                         | 293(2)                                                                                                           |
| Crystal system                                                                                        | triclinic                                                                                                        |
| Space group                                                                                           | P-1                                                                                                              |
| a/Å                                                                                                   | 11.0562(6)                                                                                                       |
| b/Å                                                                                                   | 16.6692(8)                                                                                                       |
| c/Å                                                                                                   | 16.8624(9)                                                                                                       |
| α/°                                                                                                   | 66.061(4)                                                                                                        |
| β/°                                                                                                   | 72.958(4)                                                                                                        |
| γ/°                                                                                                   | 76.854(4)                                                                                                        |
| Volume/Å <sup>3</sup>                                                                                 | 2694.6(3)                                                                                                        |
| Z                                                                                                     | 2                                                                                                                |
| ρ <sub>calc</sub> /g cm <sup>-3</sup>                                                                 | 1.610                                                                                                            |
| μ / mm <sup>-1</sup>                                                                                  | 3.002                                                                                                            |
| F(000)                                                                                                | 1292.0                                                                                                           |
| Crystal size / mm <sup>3</sup>                                                                        | 0.40 x 0.35 x 0.31                                                                                               |
| Radiation                                                                                             | MoKα (λ = 0.71073)                                                                                               |
| 2θ range for data collection/°                                                                        | 3.884 to 49.998                                                                                                  |
| Index ranges                                                                                          | -13 ≤ h ≤ 13, -19 ≤ k ≤ 19, -19 ≤ l ≤ 20                                                                         |
| Reflections collected                                                                                 | 21118                                                                                                            |
| Independent reflections                                                                               | 9430 [R <sub>int</sub> = 0.0756, R <sub>sigma</sub> = 0.0890]                                                    |
| Data/restraints/parameters                                                                            | 9430/0/628                                                                                                       |
| Goodness-of-fit on F <sup>2</sup>                                                                     | 0.890                                                                                                            |
| Final R indexes [I ≥ 2σ (I)]                                                                          | R <sub>1</sub> = 0.0335, wR <sub>2</sub> = 0.0580                                                                |
| Final R indexes [all data]                                                                            | R <sub>1</sub> = 0.0586, wR <sub>2</sub> = 0.0669                                                                |
| Largest diff. peak/hole / e Å <sup>-3</sup>                                                           | 1.36/-0.93                                                                                                       |
| Diffractometer                                                                                        | STOE IPDS 2T                                                                                                     |
| CCDC access code                                                                                      | 2244438                                                                                                          |

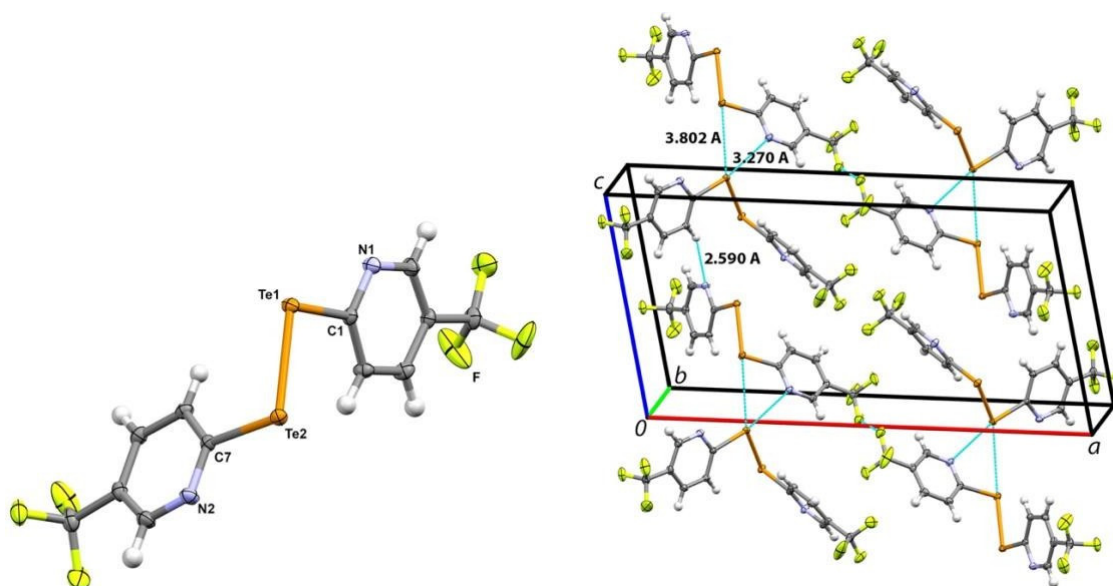

**Figure S1.** Structure of  $(\text{CF}_3\text{pyTe})_2$  (**1**). Ellipsoid plot with thermal ellipsoids representing 50 per cent probability and unit cell plot illustrating secondary Te...Te bonds of 3.802 Å, intermolecular Te...N contacts of 3.270 Å and a weak intermolecular H bond of 2.590 Å.

**Table S2.** Selected bond lengths (Å) and angles (°) in  $(\text{CF}_3\text{pyTe})_2$  (**1**).

|            |          |            |           |        |          |
|------------|----------|------------|-----------|--------|----------|
| Te1-Te2    | 2.689(2) | Te1-C1     | 2.139(2)  | Te2-C7 | 2.132(2) |
| C1-Te1-Te2 | 99.83(6) | C7-Te2-Te1 | 100.05(6) |        |          |

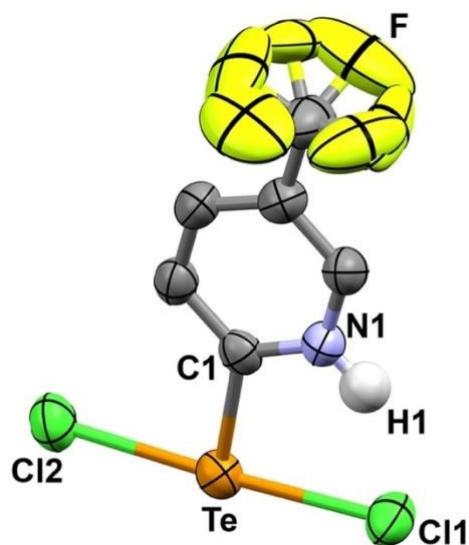

**Figure S2.** Ellipsoid representation of the molecular structure of  $(\text{HCF}_3\text{py})\text{TeCl}_2$  (**2**). Thermal ellipsoids represent 50 per cent probability.

**Table S3.** Selected bond lengths (Å) and angles (°) in  $(\text{HCF}_3\text{py})\text{TeCl}_2$  (**2**).

|            |           |           |          |            |          |
|------------|-----------|-----------|----------|------------|----------|
| Te-Cl1     | 2.576(1)  | Te-Cl2    | 2.525(1) | Te-C1      | 2.120(5) |
| Cl1-Te-Cl2 | 177.29(5) | Cl1-Te-C1 | 87.1(1)  | Cl2-Te1-C1 | 90.4(1)  |

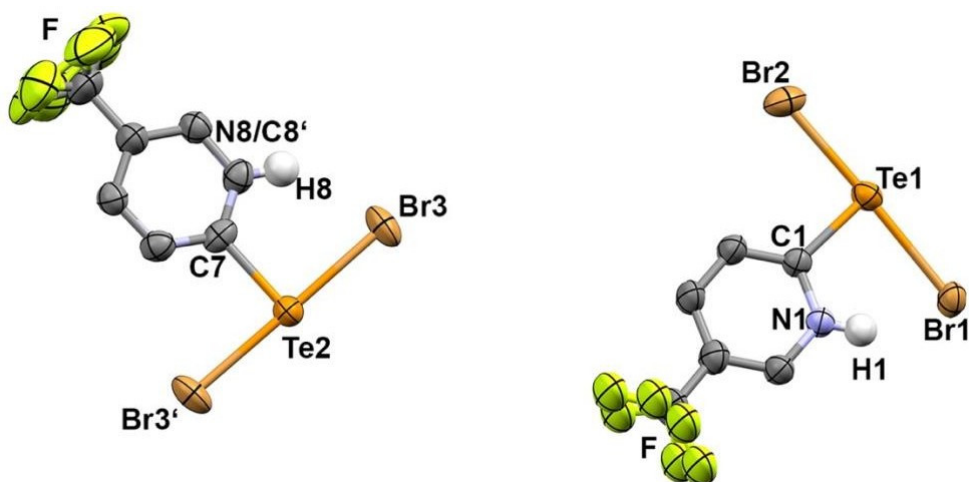

**Figure S3.** Ellipsoid representation of the molecular structure of (HCF<sub>3</sub>py)TeBr<sub>2</sub> (**3**). Thermal ellipsoids represent 50 per cent probability.

**Table S4.** Selected bond lengths (Å) and angles (°) in (HCF<sub>3</sub>py)TeBr<sub>2</sub> (**3**).

|              |           |            |          |            |          |
|--------------|-----------|------------|----------|------------|----------|
| Te1-Br1      | 2.819(1)  | Te1-Br2    | 2.640(1) | Te1-C1     | 2.123(3) |
| Te2-Br3      | 2.706(1)  | Te2-C7     | 2.15(1)  |            |          |
| Br1-Te1-Br2  | 178.24(4) | Br1-Te1-C1 | 87.6(1)  | Br2-Te1-C1 | 90.7(1)  |
| Br3-Te2-Br3' | 179.13(6) | Br3-Te2-C7 | 89.56(3) |            |          |

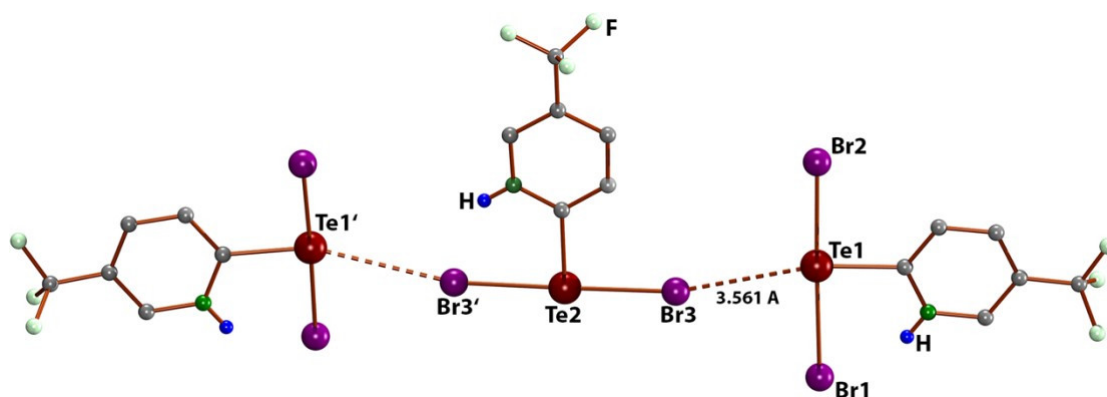

**Figure S4.** 'Long-range' Te-Br interactions in (HCF<sub>3</sub>py)TeBr<sub>2</sub> (**3**).



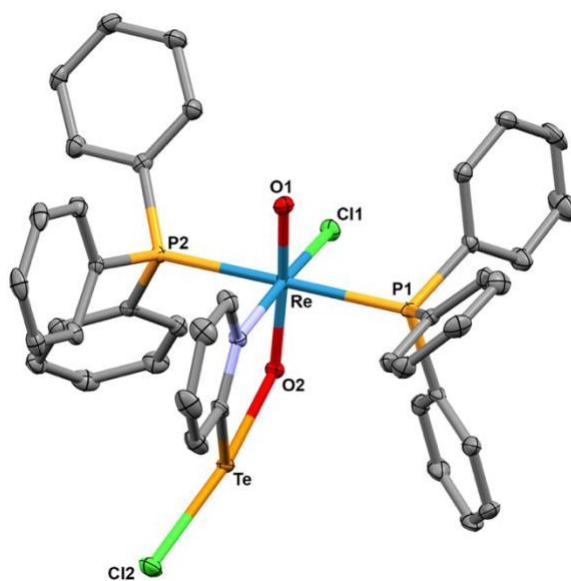

**Figure S5.** Ellipsoid representation of the molecular structure of  $[\text{ReO}_2\text{Cl}(\text{pyTeCl})(\text{PPh}_3)_2]$  (**5**). Thermal ellipsoids represent 50 per cent probability.

**Table S5.** Selected bond lengths (Å) and angles (°) in  $[\text{ReO}_2\text{Cl}(\text{pyTeCl})(\text{PPh}_3)_2]$  (**5**).

|          |           |          |           |           |           |
|----------|-----------|----------|-----------|-----------|-----------|
| Re-O1    | 1.730(2)  | Re-O2    | 1.824(2)  | Re-N1     | 2.193(2)  |
| Re-Cl1   | 2.3816(8) | Re-P1    | 2.5192(9) | Re-P2     | 2.5012(9) |
| O2-Te    | 2.102(2)  | Te-Cl2   | 2.5736(9) | Te-C1     | 2.136(3)  |
| O1-Re-O2 | 168.42(9) | O1-Re-N1 | 87.80(9)  | O1-Re-Cl1 | 97.87(7)  |
| O1-Re-P1 | 91.46(7)  | O1-Re-P2 | 90.52(7)  | Re-O2-Te  | 134.3(1)  |
| O2-Te-C1 | 81.23(9)  | Re-N1-C1 | 134.7(2)  | N1-C1-Te  | 117.8(2)  |

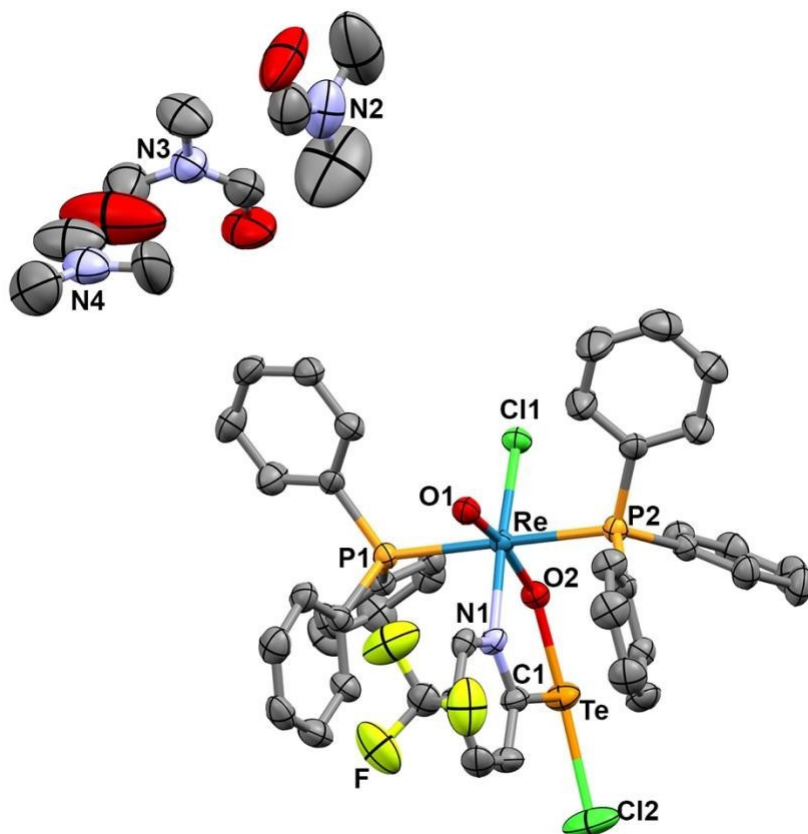

**Figure S6.** Ellipsoid representation of the molecular structure of  $[\text{ReO}_2\text{Cl}(\text{CF}_3\text{pyTeCl})(\text{PPh}_3)_2]$  (**4**) x 3 DMF. Thermal ellipsoids represent 50 per cent probability.

**Table S6.** Selected bond lengths (Å) and angles (°) in  $[\text{ReO}_2\text{Cl}(\text{CF}_3\text{pyTeCl})(\text{PPh}_3)_2]$  (**4**).

|          |          |          |          |           |          |
|----------|----------|----------|----------|-----------|----------|
| Re-O1    | 1.721(4) | Re-O2    | 1.822(3) | Re-N1     | 2.201(4) |
| Re-Cl1   | 2.383(1) | Re-P1    | 2.511(1) | Re-P2     | 2.514(1) |
| O2-Te    | 2.102(4) | Te-Cl2   | 2.578(2) | Te-C1     | 2.125(5) |
| O1-Re-O2 | 165.9(2) | O1-Re-N1 | 86.2(2)  | O1-Re-Cl1 | 99.7(1)  |
| O1-Re-P1 | 88.3(1)  | O1-Re-P2 | 89.3(2)  | Re-O2-Te  | 135.2(2) |
| O2-Te-C1 | 81.0(2)  | Re-N1-C1 | 125.2(3) | N1-C1-Te  | 118.3(4) |

## 2. Spectroscopic Data

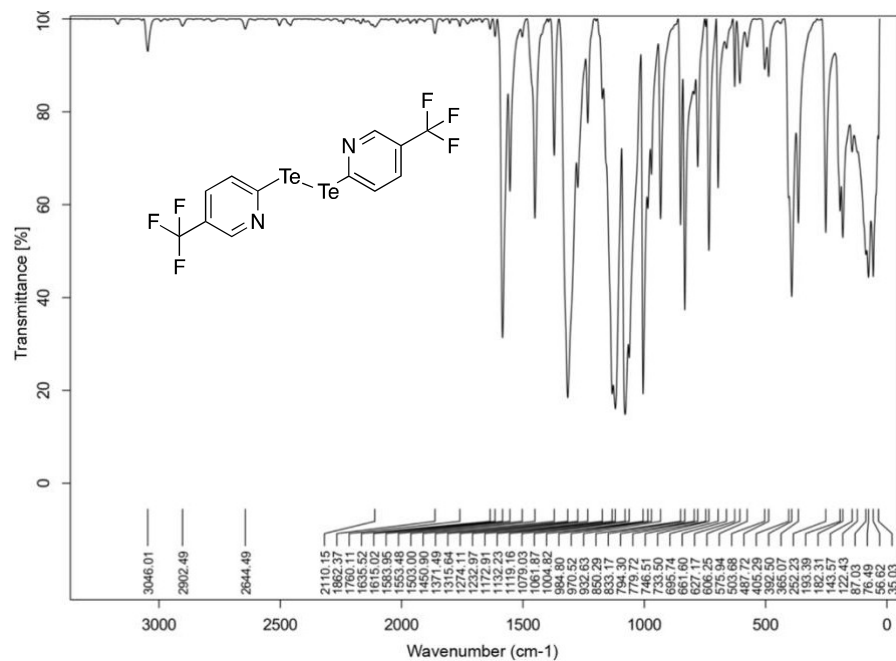

**Figure S7.** IR spectrum of bis(5-trifluoromethyl-2-pyridyl)ditellane (**1**)

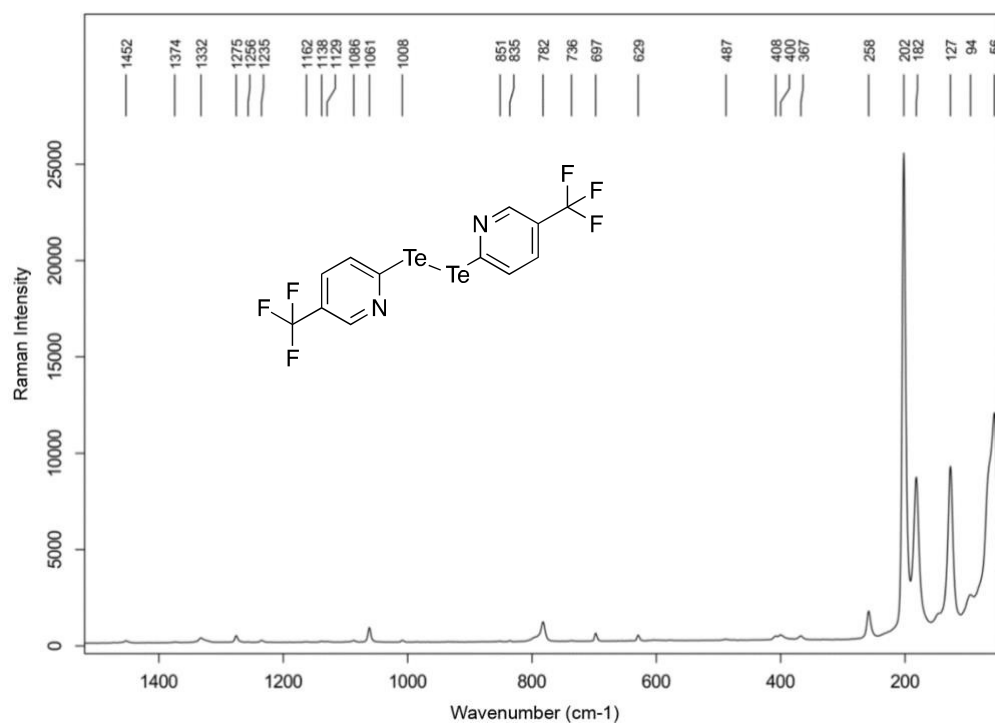

**Figure S8.** Raman spectrum of bis(5-trifluoromethyl-2-pyridyl)ditellane (**1**)

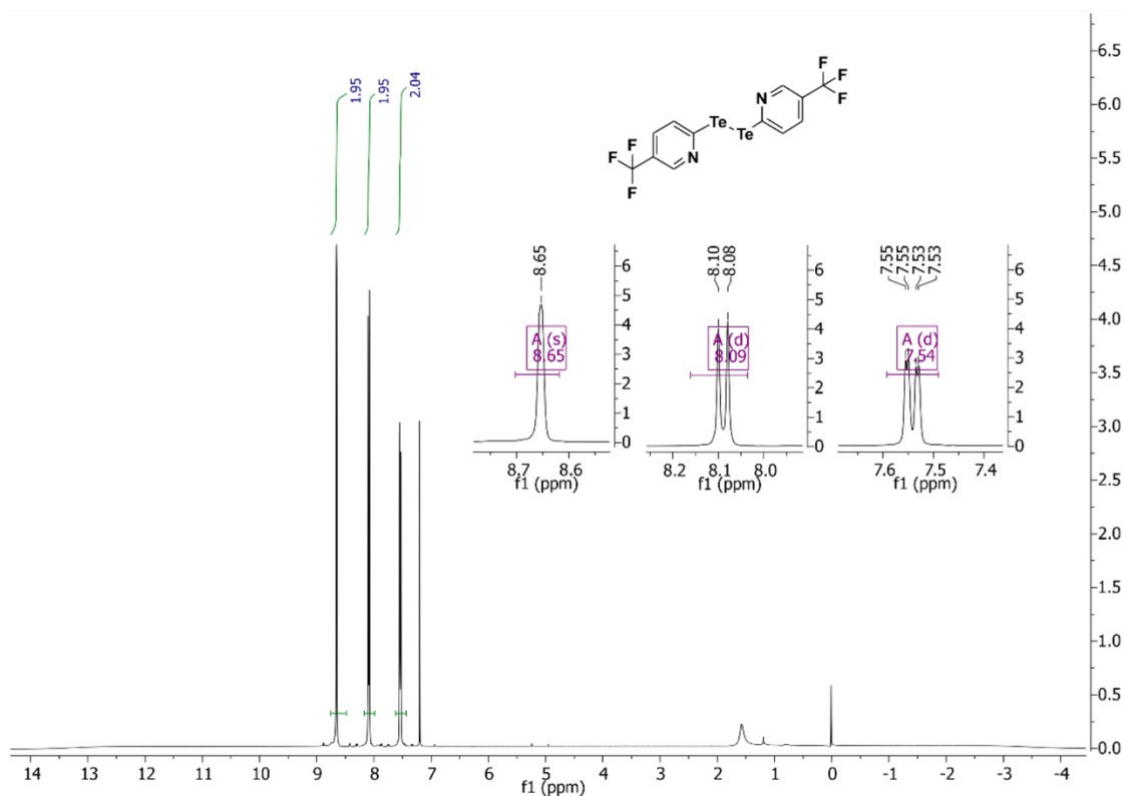

**Figure S9.** <sup>1</sup>H NMR spectrum of bis(5-trifluoromethyl-2-pyridyl)ditellane (**1**) in CDCl<sub>3</sub>.

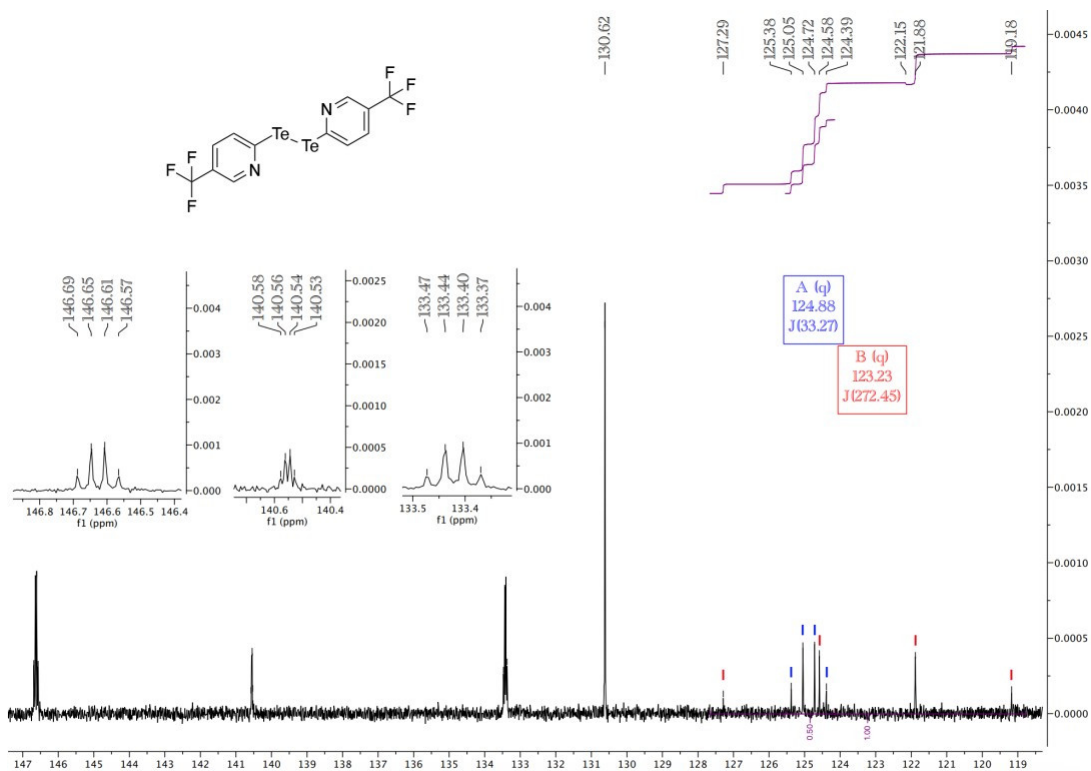

**Figure S10.** <sup>13</sup>C NMR spectrum of bis(5-trifluoromethyl-2-pyridyl)ditellane (**1**) in CDCl<sub>3</sub>.

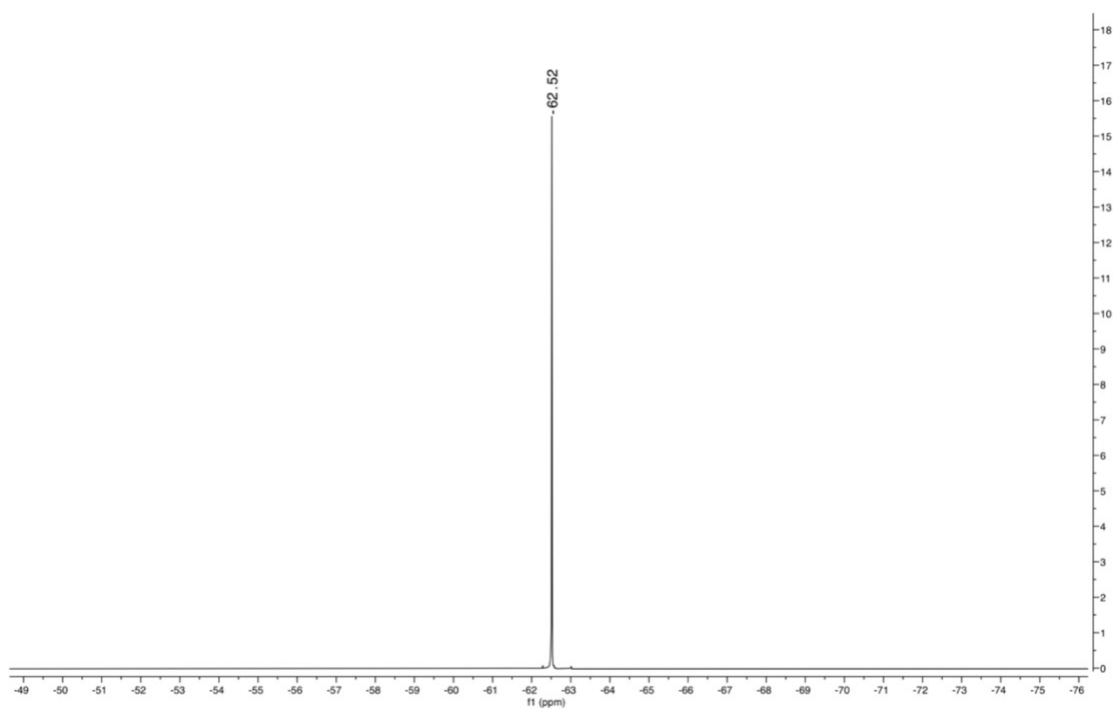

**Figure S11.**  $^{19}\text{F}$  NMR spectrum of bis(5-trifluoromethyl-2-pyridyl)ditellane (**1**) in  $\text{CDCl}_3$ .

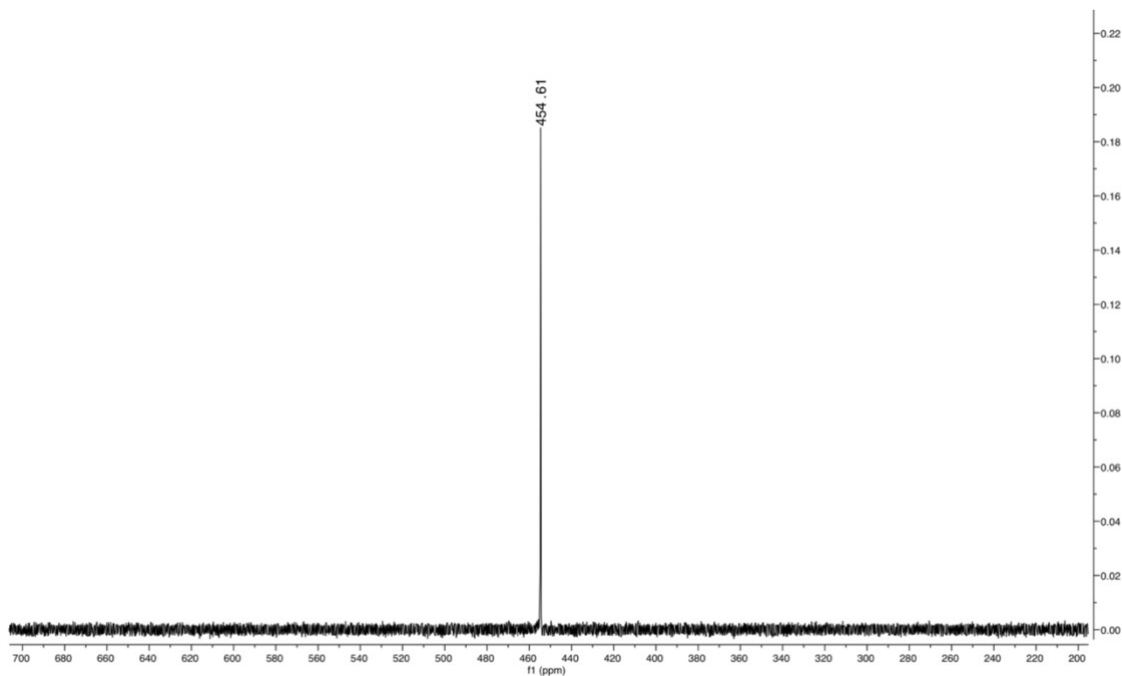

**Figure S12.**  $^{125}\text{Te}$  NMR spectrum of bis(5-trifluoromethyl-2-pyridyl)ditellane (**1**) in  $\text{CDCl}_3$ .

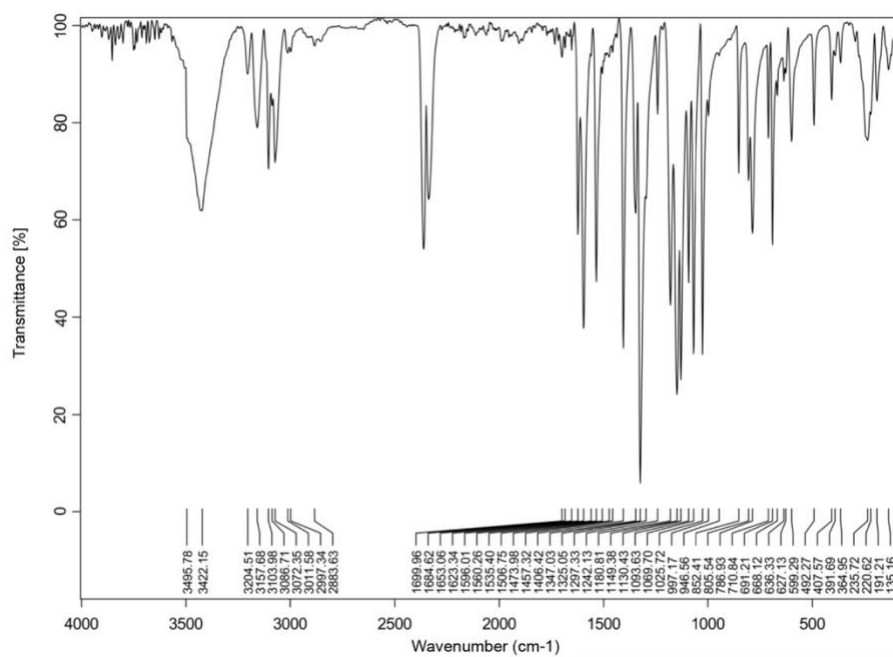

**Figure S13.** IR spectrum of (HCF<sub>3</sub>py)TeCl<sub>2</sub> (2).

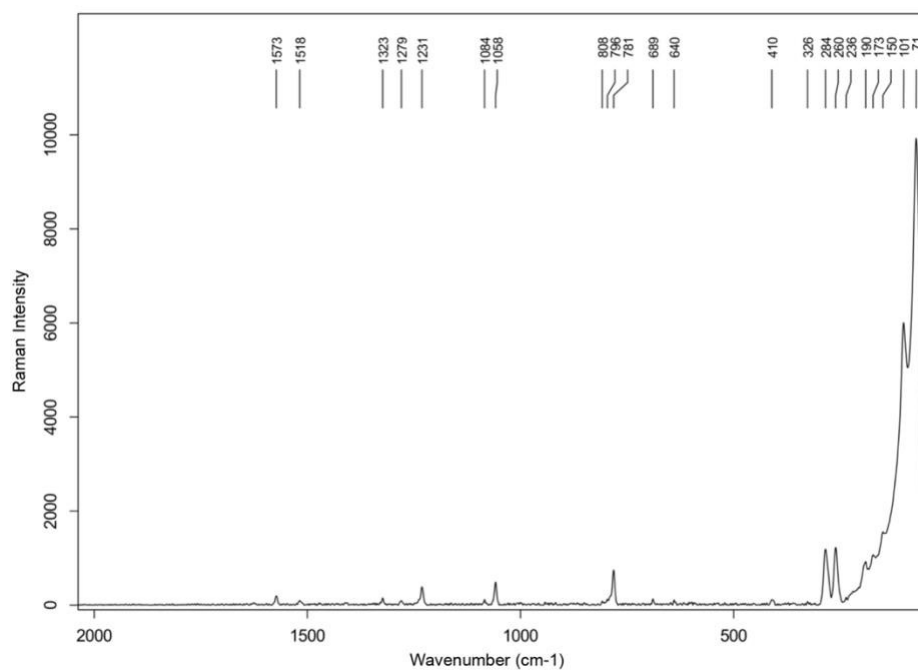

**Figure S14.** Raman spectrum of (CF<sub>3</sub>pyH)TeCl<sub>2</sub> (2).

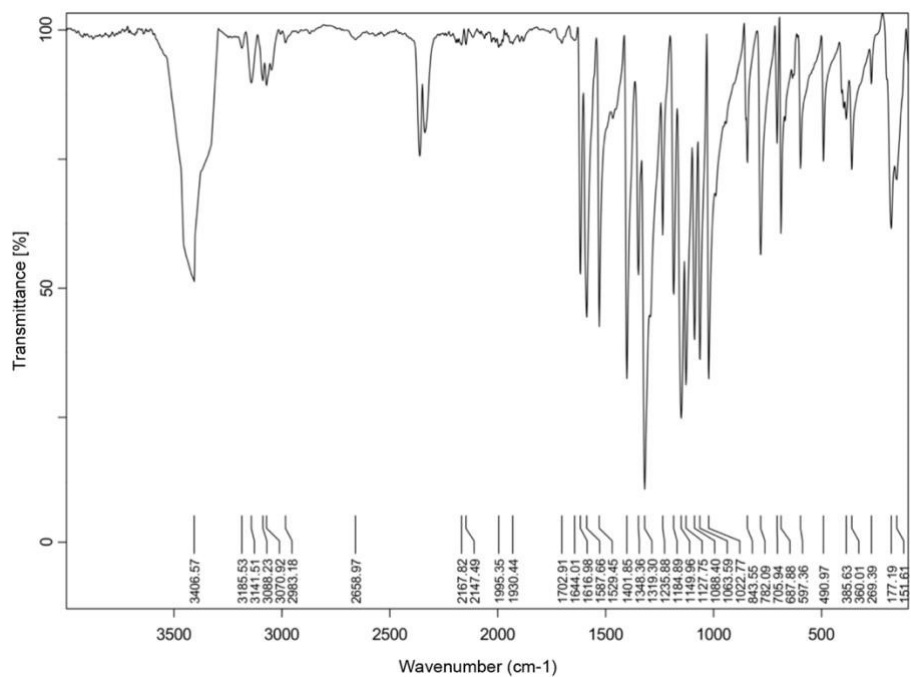

**Figure S15.** IR spectrum of (HCF<sub>3</sub>py)TeBr<sub>2</sub> (**3**).

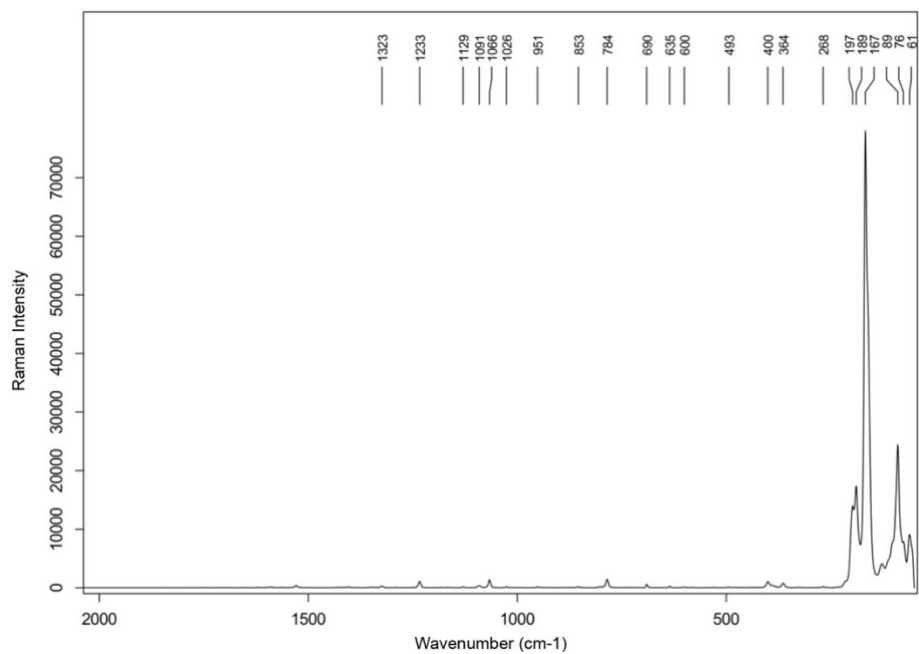

**Figure S16.** Raman spectrum of (HCF<sub>3</sub>py)TeBr<sub>2</sub> (**3**).

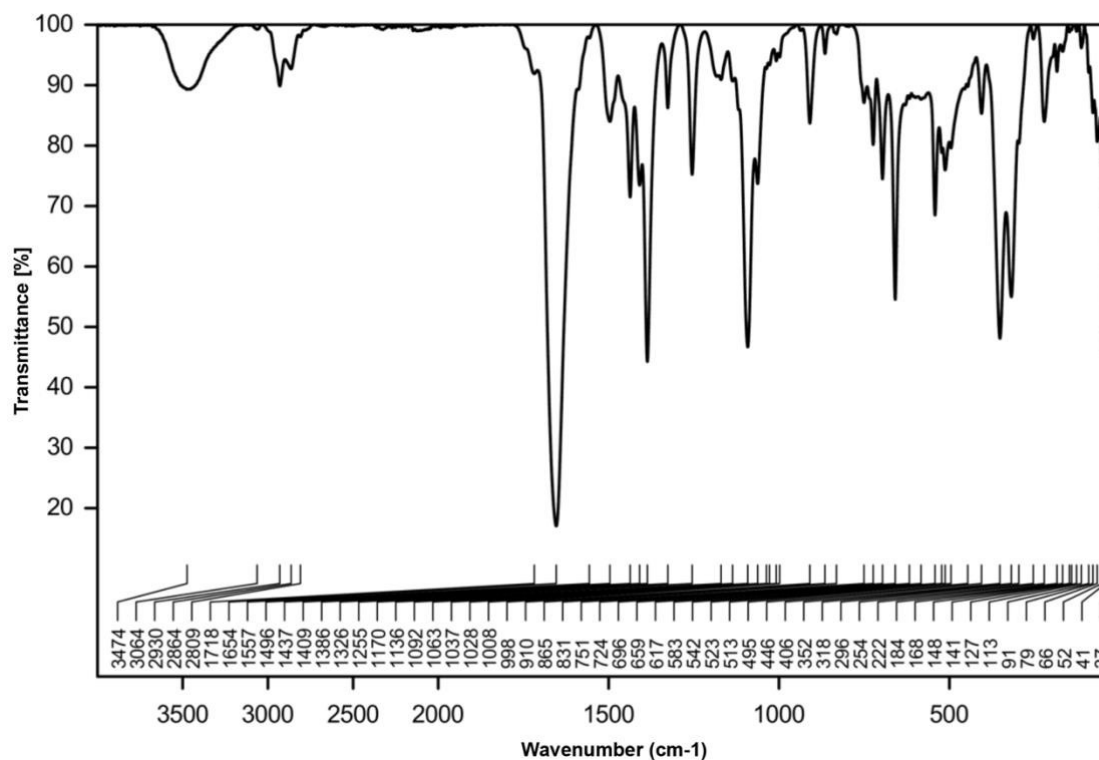

**Figure S17.** IR spectrum of  $[\text{ReO}_2\text{Cl}(\text{CF}_3\text{pyTeCl})(\text{PPh}_3)_2]$  (**4**).

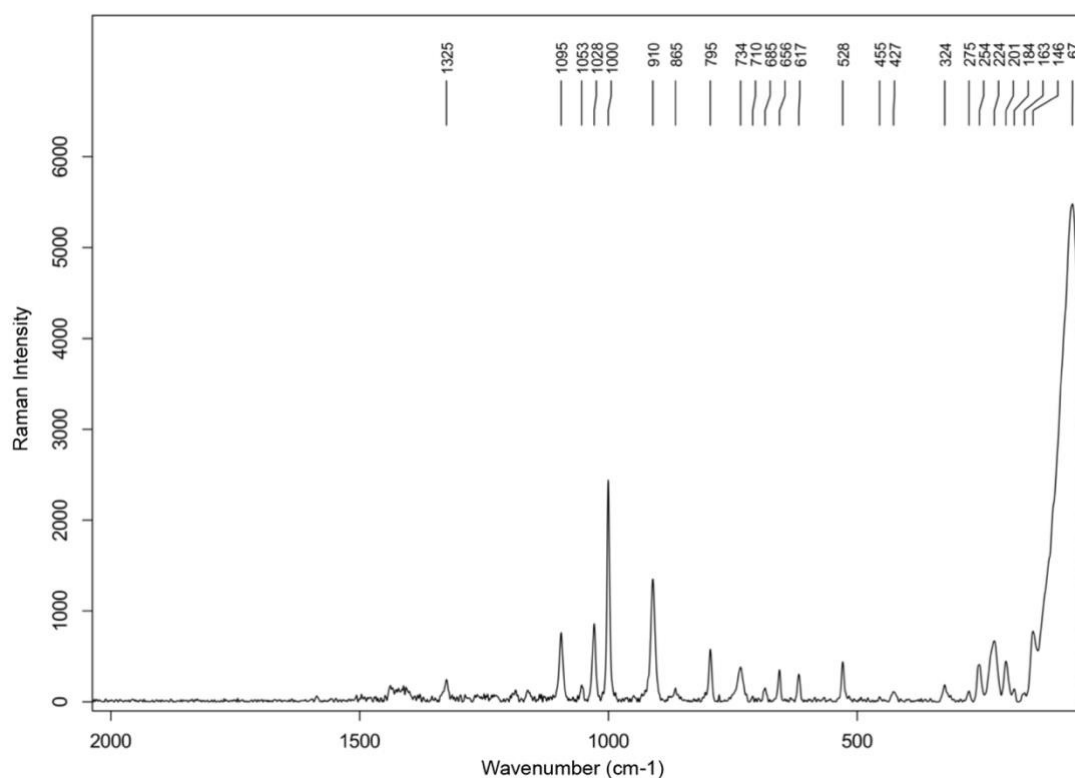

**Figure S18.** Raman spectrum of  $[\text{ReO}_2\text{Cl}(\text{CF}_3\text{pyTeCl})(\text{PPh}_3)_2]$  (**4**)



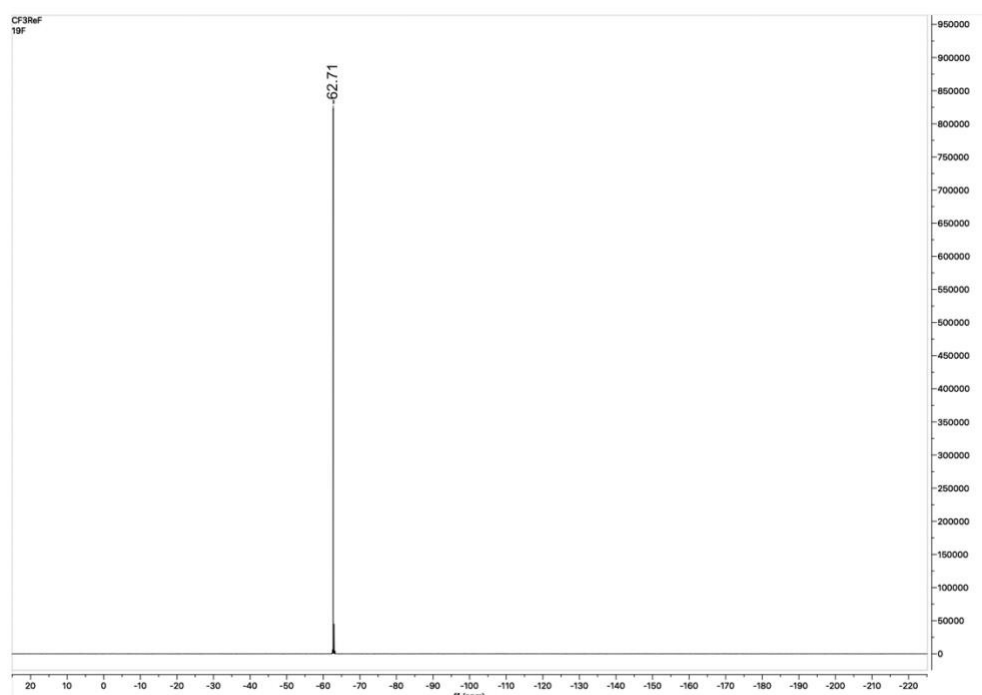

**Figure S19.**  $^{19}\text{F}$  NMR spectrum of  $[\text{ReO}_2\text{Cl}(\text{CF}_3\text{pyTeCl})(\text{PPh}_3)_2]$  (**4**).

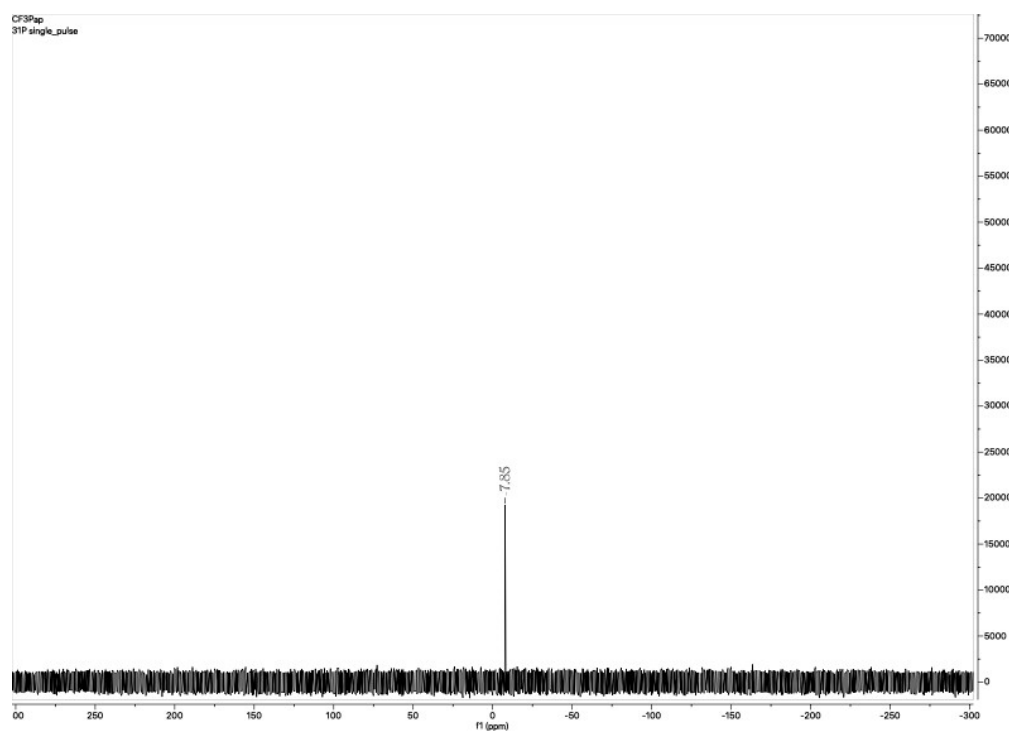

**Figure S20.**  $^{31}\text{P}$  NMR spectrum of  $[\text{ReO}_2\text{Cl}(\text{CF}_3\text{pyTeCl})(\text{PPh}_3)_2]$  (**4**).

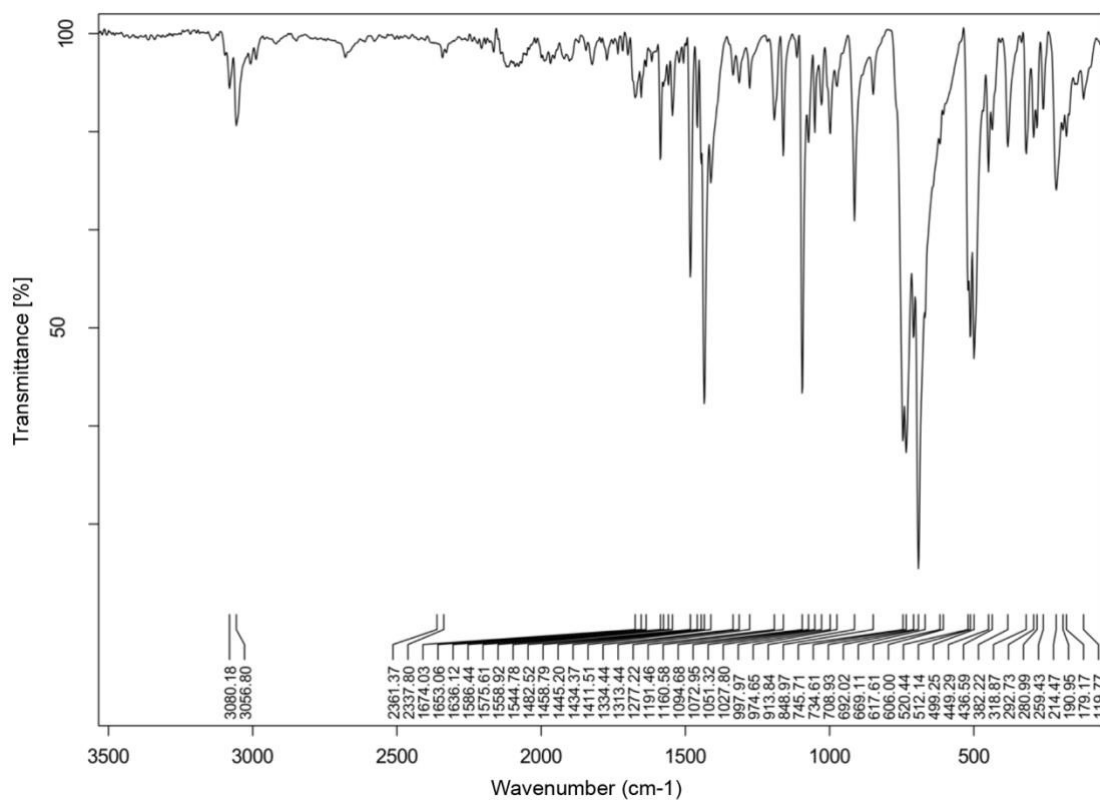

**Figure S21.** IR spectrum of  $[\text{ReO}_2\text{Cl}(\text{pyTeCl})(\text{PPh}_3)_2]$  (**5**).

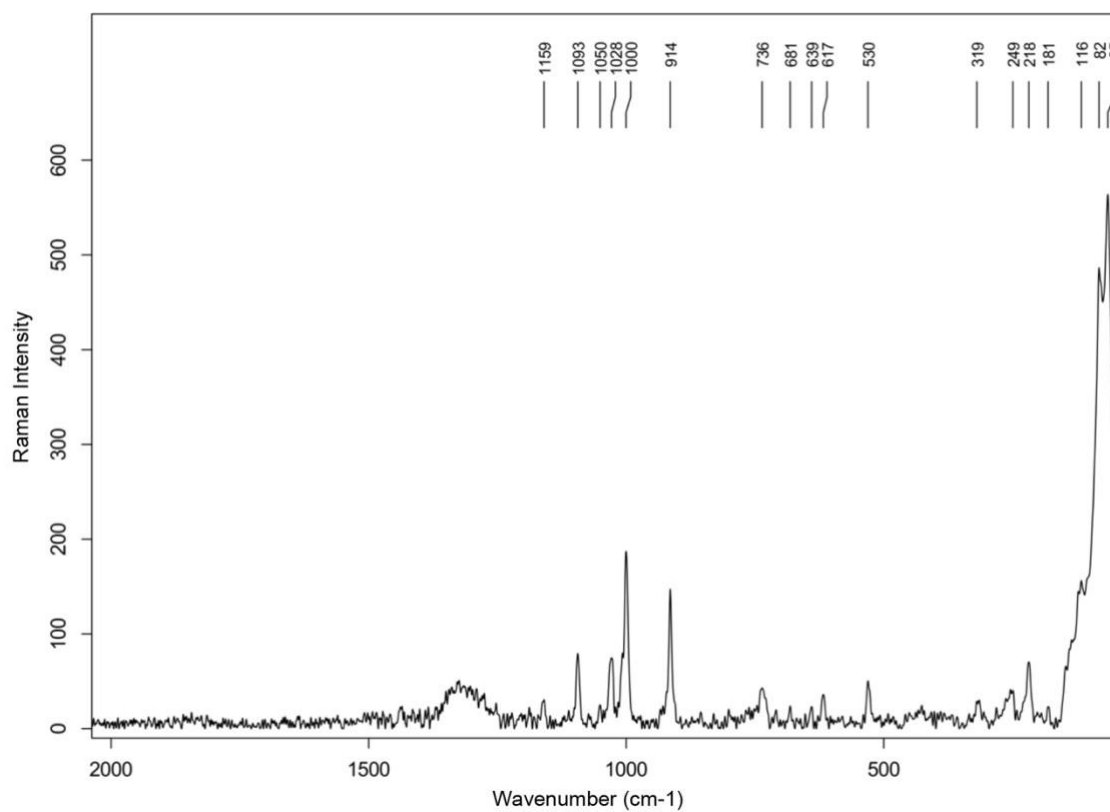

**Figure S22.** Raman spectrum of  $[\text{ReO}_2\text{Cl}(\text{pyTeCl})(\text{PPh}_3)_2]$  (**5**).

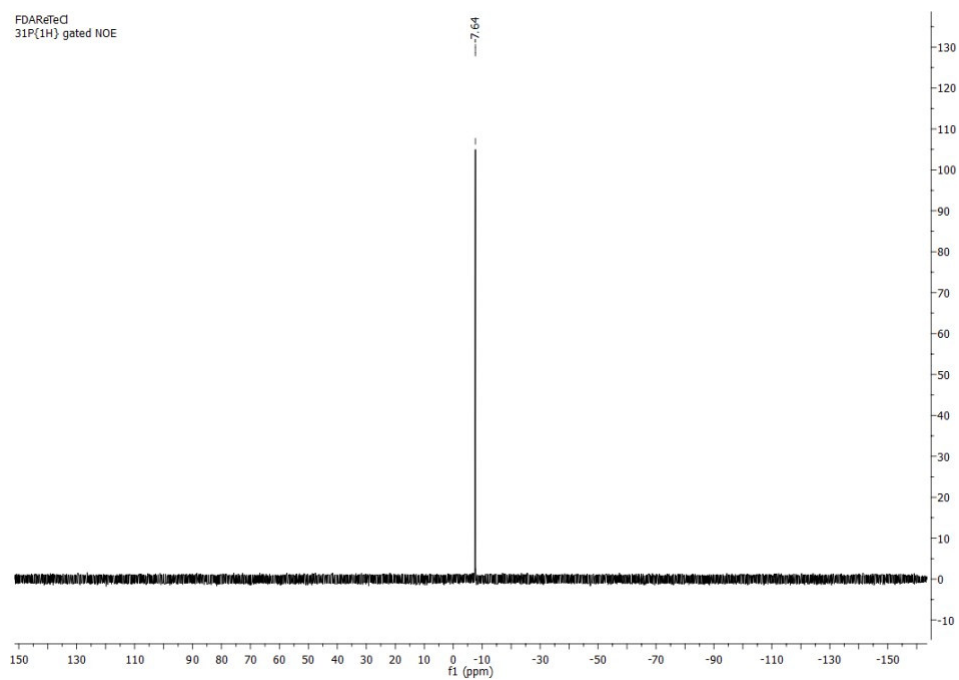

**Figure S23.**  $^{31}\text{P}$  NMR spectrum of  $[\text{ReO}_2\text{Cl}(\text{pyTeCl})(\text{PPh}_3)_2]$  (**5**).

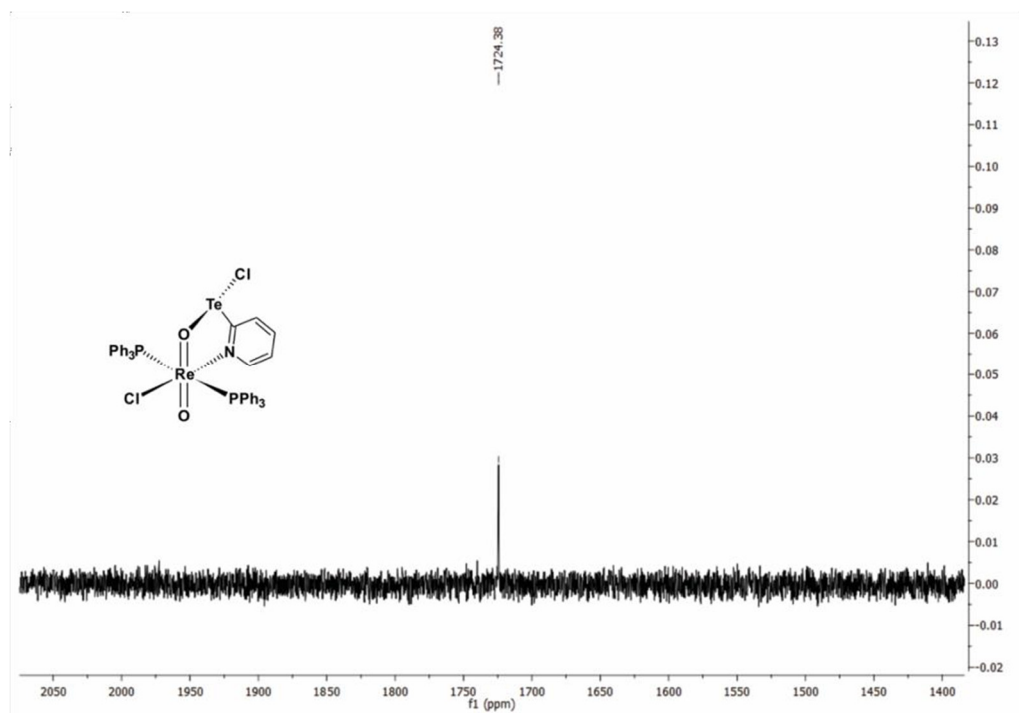

**Figure S24.**  $^{125}\text{Te}$  NMR spectrum of  $[\text{ReO}_2\text{Cl}(\text{pyTeCl})(\text{PPh}_3)_2]$  (**5**).

### S3. Computational Chemistry

**Table S7.** Results of the charge analysis for selected atoms in [ReO<sub>2</sub>Cl(pyTeCl)(PPh<sub>3</sub>)<sub>2</sub>] (**5**). Wiberg bond order matrix for selected atoms, relevant bond orders are bold.

|      | Bader charge | ADCH charge | Wiberg bond order matrix |            |            |            |            |            |            |            |
|------|--------------|-------------|--------------------------|------------|------------|------------|------------|------------|------------|------------|
|      |              |             | Re1                      | Te2        | O5         | Cl4        | N6         | Cl11       | O12        | C75        |
| Re1  | 2.963592     | 1.664582    | <b>6.6</b>               | 0.1        | <b>0.8</b> | 0          | <b>0.4</b> | <b>1.0</b> | <b>2.2</b> | 0.1        |
| Te2  | 1.331715     | 0.811975    |                          | <b>2.4</b> | <b>0.7</b> | <b>0.3</b> | 0.1        | 0          | 0          | <b>0.9</b> |
| O5   | -1.955526    | -1.374591   |                          |            | <b>2.0</b> | 0          | 0          | 0.1        | 0.1        | 0.1        |
| Cl4  | -1.020208    | -0.928387   |                          |            |            | <b>0.4</b> | 0          | 0          | 0          | 0          |
| N6   | -1.340768    | -0.262371   |                          |            |            |            | <b>3.8</b> | 0          | 0          | <b>1.9</b> |
| Cl11 | -0.638446    | -0.467039   |                          |            |            |            |            | <b>1.3</b> | 0.1        | 0          |
| O12  | -0.979281    | -0.467644   |                          |            |            |            |            |            | <b>2.9</b> | 0          |
| C75  | 0.499392     | 0.334154    |                          |            |            |            |            |            |            | <b>4.4</b> |

**Table S8.** Lone-pair decomposition of Re and Te in [ReO<sub>2</sub>Cl(pyTeCl)(PPh<sub>3</sub>)<sub>2</sub>] (**5**).

| Orbital | Population | s      | p      | d      |
|---------|------------|--------|--------|--------|
| LP(1)Re | 1.94282    | 0.00%  | 0.01%  | 99.99% |
| LP(1)Te | 1.98754    | 88.25% | 11.74% | 0.01%  |
| LP(2)Te | 1.80730    | 0.00%  | 99.94% | 0.06%  |

**Table S9.** Natural electron configuration of selected atoms in [ReO<sub>2</sub>Cl(pyTeCl)(PPh<sub>3</sub>)<sub>2</sub>] (**5**).

|      |                                                |
|------|------------------------------------------------|
| Re1  | [core]6s(0.41)5d(5.60)6p(0.01)6d(0.05)7p(0.01) |
| Te2  | [core]5s(1.84)5p(3.21)5d(0.01)6p(0.01)         |
| Cl4  | [core]3s(1.97)3p(5.61)                         |
| O5   | [core]2s(1.81)2p(5.02)3p(0.01)4p(0.01)         |
| N6   | [core]2s(1.30)2p(4.18)3p(0.02)                 |
| Cl11 | [core]3s(1.92)3p(5.53)                         |
| O12  | [core]2s(1.84)2p(4.75)3d(0.01)                 |

**Table S10.** Selected parameters from the second order perturbation analysis of  $[\text{ReO}_2\text{Cl}(\text{pyTeCl})(\text{PPh}_3)_2]$  (**5**). Delocalization, which was interpreted as an ionic bond is bold.

| Donor NBO       | Acceptor NBO        | $E_{\text{deloc.}}$ (kcal/mol) | $\Delta E_{\text{donor-acceptor}}$ (a.u.) | $F$ (a.u.)   |
|-----------------|---------------------|--------------------------------|-------------------------------------------|--------------|
| <b>LP(2)O1</b>  | <b>LV(1)Re1</b>     | <b>198.08</b>                  | <b>0.53</b>                               | <b>0.289</b> |
| LP(2)Te         | BD*(2)N1-C75        | 20.87                          | 0.16                                      | 0.051        |
| LP(1)Cl1        | LV(1)Te             | 9.37                           | 0.55                                      | 0.064        |
| <b>LP(4)Cl1</b> | <b>LV(1)Te</b>      | <b>115</b>                     | <b>0.19</b>                               | <b>0.131</b> |
| LP(1)O2         | LV(1)Re             | 52.85                          | 0.75                                      | 0.178        |
| <b>LP(2)O2</b>  | <b>LV(1)Re</b>      | <b>95.55</b>                   | <b>0.41</b>                               | <b>0.176</b> |
| LP(2)O2         | BD*(2)Re-1O1        | 18.23                          | 0.26                                      | 0.062        |
| <b>LP(3)O2</b>  | <b>BD*(1)Re-1O1</b> | <b>67.66</b>                   | <b>0.18</b>                               | <b>0.1</b>   |
| <b>LP(4)O2</b>  | <b>LV(1)Re</b>      | <b>88.04</b>                   | <b>0.49</b>                               | <b>0.186</b> |
| LP(4)O5         | BD*(2)Re-1O12       | 11.89                          | 0.35                                      | 0.058        |
| <b>LP(2)O5</b>  | <b>LV(1)Te2</b>     | <b>68.78</b>                   | <b>0.23</b>                               | <b>0.113</b> |
| LP(1)O5         | LV(1)Te2            | 38.46                          | 0.58                                      | 0.133        |
| LP(4)O5         | LV(1)Te2            | 35.25                          | 0.32                                      | 0.095        |
| LP(2)Te2        | BD*(2)N6-C75        | 20.87                          | 0.16                                      | 0.051        |

**Table S11.** Three-centered *trans*-bonds around Re (3c4e hyper-bonds) in  $[\text{ReO}_2\text{Cl}(\text{pyTeCl})(\text{PPh}_3)_2]$  (**5**).

| Hyperbond | A:-B:-C    | %A-B/%B-C | occ    | BD(A-B) | LP(C) | h(A) | h(B) | h(C) |
|-----------|------------|-----------|--------|---------|-------|------|------|------|
| 1         | P1:-Re:-P2 | 49.5/50.5 | 3.9456 | 67      | 61    | 67   | 68   | 61   |
| 2         | Cl1:-Re:-N | 57.1/42.9 | 4.0453 | 68      | 60    | 69   | 70   | 60   |
| 3         | O1:-Re:-O2 | 57.4/42.6 | 4.0369 | 69      | 58    | 71   | 72   | 58   |

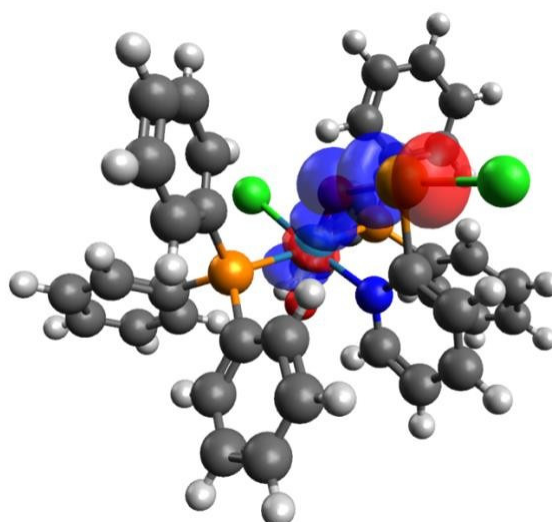

**Figure S25.** Donation of lone pair 1 (LP1) of O2 into empty valence orbital 1 (LV1) of Re and Te in  $[\text{ReO}_2\text{Cl}(\text{pyTeCl})(\text{PPh}_3)_2]$  (**5**) based on the NBO analysis. The isosurfaces are shown with an isosurface value of 0.08.

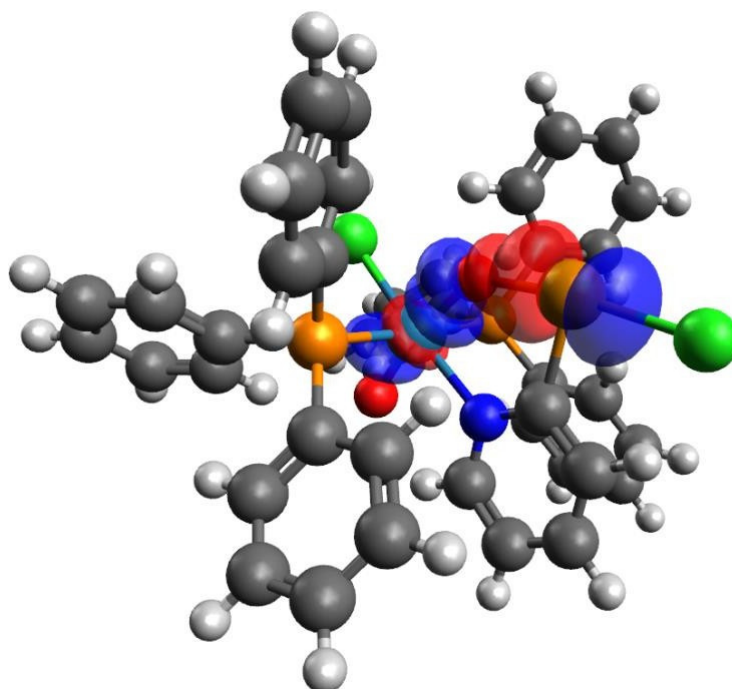

**Figure S26..** Donation of lone pair 2 (LP2) of O2 into empty valence orbital 1 (LV1) of Re and Te in  $[\text{ReO}_2\text{Cl}(\text{pyTeCl})(\text{PPh}_3)_2]$  (5) based on the NBO analysis. The isosurfaces are shown with an isosurface value of 0.08.

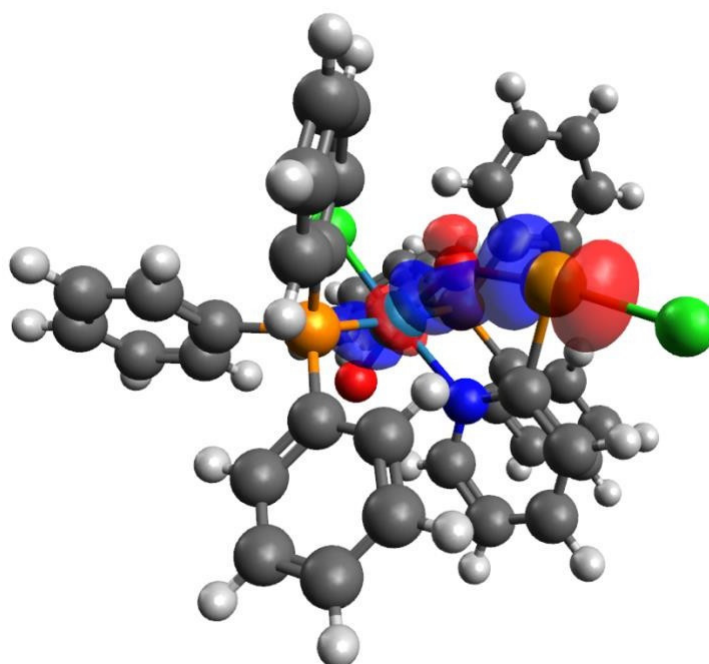

**Figure S27.** Donation of lone pair 4 (LP4) of O2 into empty valence orbital 1 (LV1) of Re and Te in  $[\text{ReO}_2\text{Cl}(\text{pyTeCl})(\text{PPh}_3)_2]$  (5) based on the NBO analysis. The isosurfaces are shown with an isosurface value of 0.08.

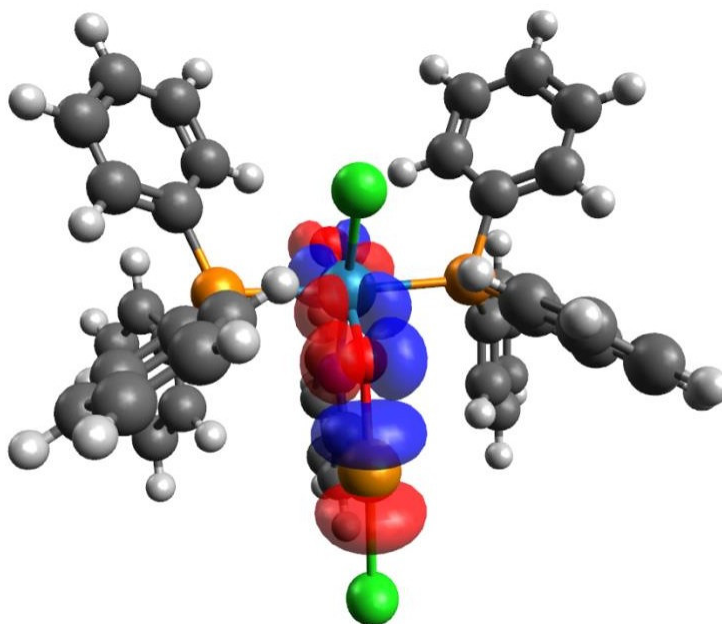

**Figure S28.** Donation of lone pair 3 (LP3) of O2 into the antibonding Re-O1 orbital of  $[\text{ReO}_2\text{Cl}(\text{pyTeCl})(\text{PPh}_3)_2]$  (**5**) based on the NBO analysis. LV1 of Te is also shown to visualize the orthogonality of the two orbitals and the absence of donation of LP3 of O2 into this orbital. The isosurfaces are shown with an isosurface value of 0.08.

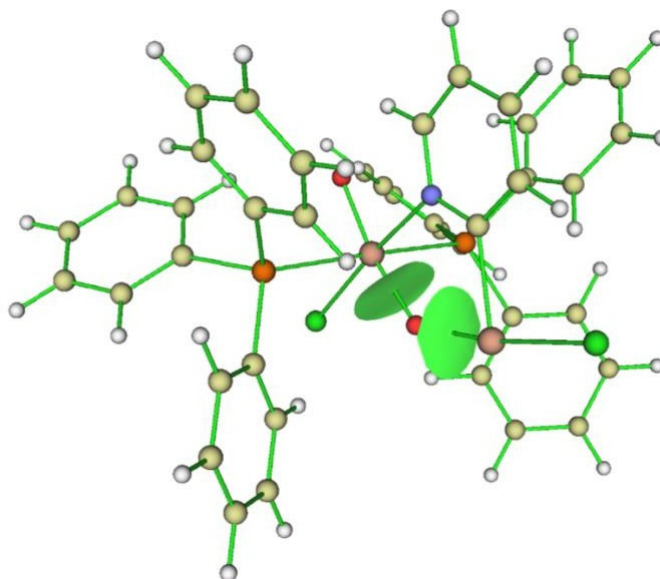

**Figure S29.** Interbasin surfaces of Re-O2 and Te-O2 contacts in  $[\text{ReO}_2\text{Cl}(\text{pyTeCl})(\text{PPh}_3)_2]$  (**5**).

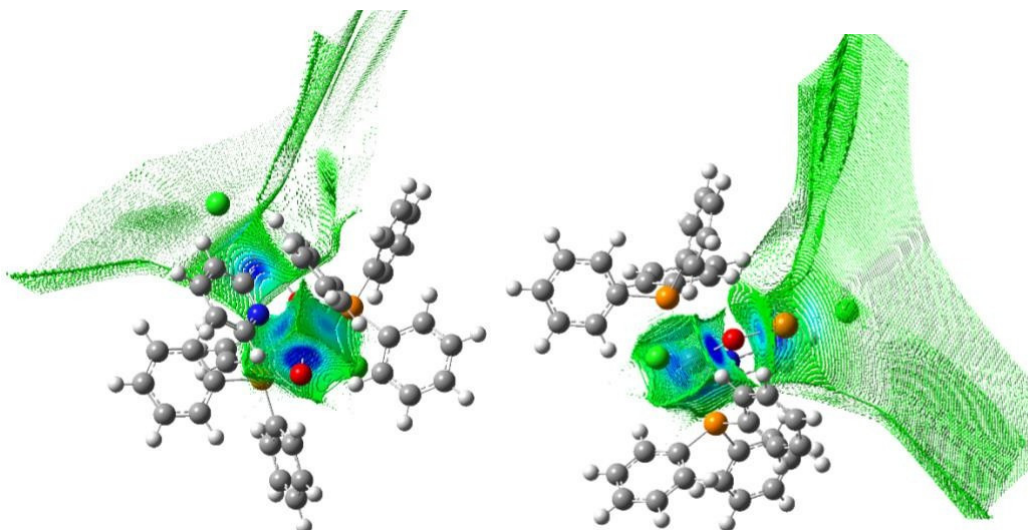

**Figure S30.** Basins of Re and Te in  $[\text{ReO}_2\text{Cl}(\text{pyTeCl})(\text{PPh}_3)_2]$  (**5**) with mapping of the electron density at the 0.06 isosurface value. The electron density at the surface is a measure of the bond strength.

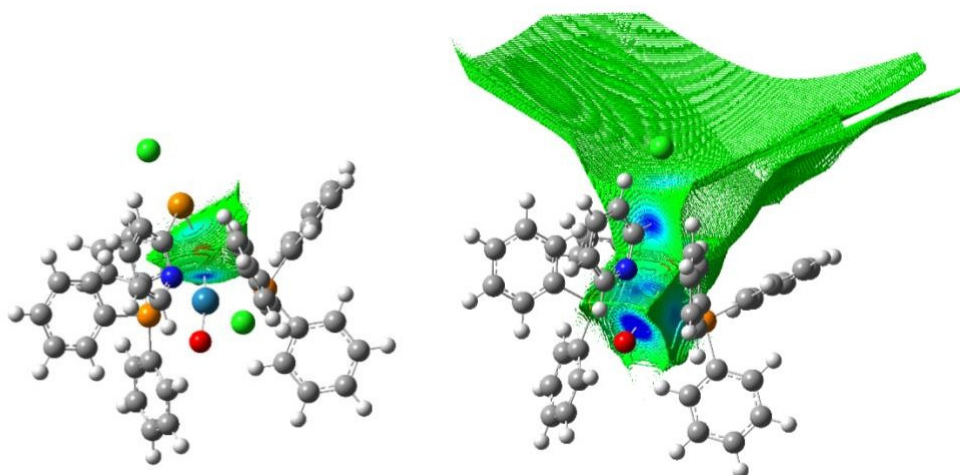

**Figure S31.** Basins of O2 and the superposition of Re, Te and O2 basins in  $[\text{ReO}_2\text{Cl}(\text{pyTeCl})(\text{PPh}_3)_2]$  (**5**) with mapping of the electron density at the 0.06 isosurface value. The electron density at the surface is a measure of the bond strength.

**Table S12.** Selected properties of the electron density at important bond critical points in  $[\text{ReO}_2\text{Cl}(\text{pyTeCl})(\text{PPh}_3)_2]$  (**5**).

| (3,-1)cp | $\rho(r)$ | $\nabla^2\rho(r)$ | $\varepsilon(r)$ | $\lambda_1(r)$ | $\lambda_2(r)$ | $\lambda_3(r)$ | $\eta(r)$ | $H(r)$  | $\delta(A,B)$ |
|----------|-----------|-------------------|------------------|----------------|----------------|----------------|-----------|---------|---------------|
| O1-Re    | 0.1753    | 1.3876            | 0.4920           | -0.2226        | -0.3322        | 1.9424         | 0.1710    | -0.0630 | 1.6045        |
| O2-Re    | 0.1089    | 1.4504            | 0.0371           | -0.1762        | 1.7964         | -0.1699        | 0.0981    | -0.0028 | 0.3645        |
| O2-Te    | 0.0507    | 0.4580            | 0.2543           | -0.0456        | 0.5608         | -0.0572        | 0.1020    | -0.0060 | 0.3209        |



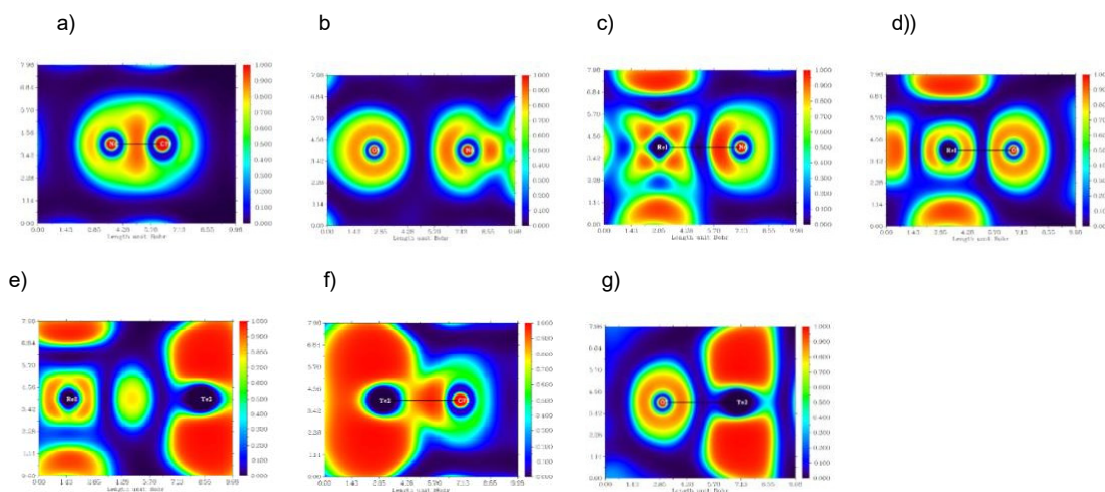

**Figure S32.** ELF with bond paths (black) in  $[\text{ReO}_2\text{Cl}(\text{pyTeCl})(\text{PPh}_3)_2]$  (**5**). Cuts through a) the C=N bond in z direction to the pyridine plane, b) the O N contact in z direction to the pyridine plane, c) the Re-N dative bond in z direction to the pyridine plane, c) the Re-O bond in z direction to the pyridine plane or along the Re-P-O plane, e) the Re Te contact in z direction to the pyridine plane, f) the Te-C bond in z direction to the pyridine plane, g) the Te-O bond in z direction to the pyridine plane.

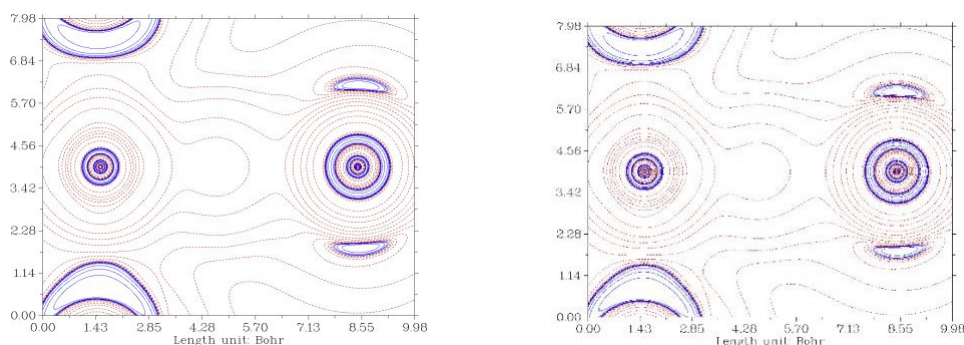

**Figure S33.** Laplacian map of the electron density in  $[\text{ReO}_2\text{Cl}(\text{pyTeCl})(\text{PPh}_3)_2]$  (**5**) (blue = negative; red = positive) with negative values corresponding to local electronic charge accumulation while positive values indicate regions of local electronic charge depletion. Cut through the Re Te contact in z direction to the pyridine plane.

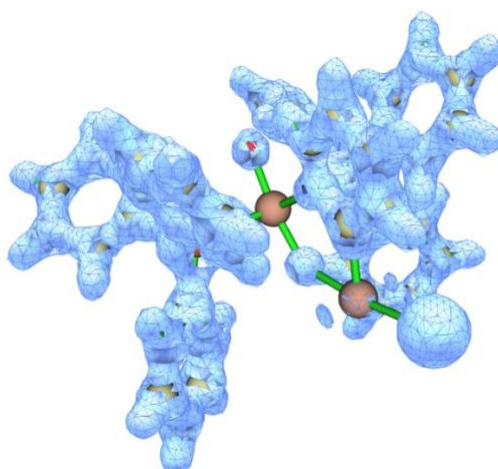

**Figure S34.** 3D Laplacian map of the electron density at the 0 (enclosure) level in  $[\text{ReO}_2\text{Cl}(\text{pyTeCl})(\text{PPh}_3)_2]$  (**5**) showing regions of electronic charge accumulation .

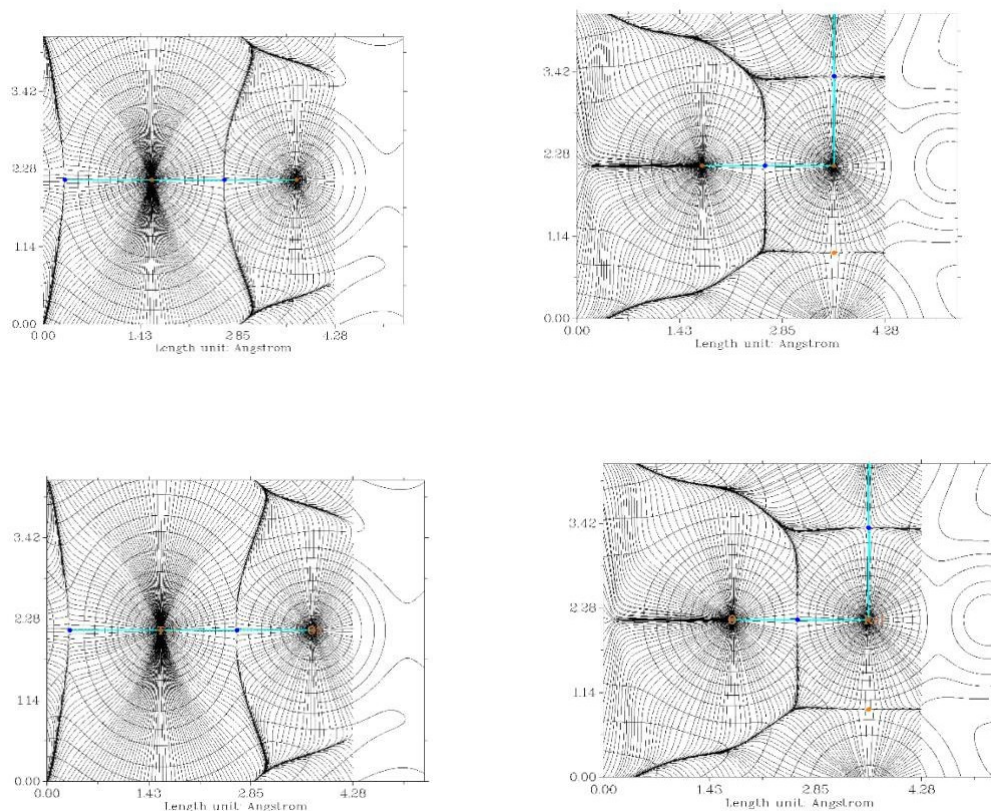

**Figure S35.** Gradient vector field of the electron density cut through the respective Te-O (left) and O-Re (right) bonds perpendicular to the Re-O-Te plane in  $[\text{ReO}_2\text{Cl}(\text{pyTeCl})(\text{PPh}_3)_2]$  (**5**) mapped on the electron density iso contour lines with topological descriptors. (3,-3) = brown, (3,-1) = blue, (3,1) = orange, bond path between (3,-3) and (3,-1) critical points = cyan. Additionally, a contour line of the van der Waals radius (black) is shown.

## S4. References

- [1] Coppens, P. The Evaluation of Absorption and Extinction in Single-Crystal Structure Analysis. Crystallographic Computing; Copenhagen, Muksgaard, 1979
- [2] Bruker. APEX2, SAINT and SADABS. Bruker AXS Inc., Madison, WI, USA (2009).
- [3] Sheldrick, G. M.: A short history of SHELX. *Acta Crystallogr. A* **64** (2008) 112–122.
- [4] Sheldrick, G. M. Crystal structure refinement with SHELXL. *Acta Crystallogr.* **2015**, *71*, 3–8.
- [5] Dolomanov, O.V.; Bourhis, L.J.; Gildea, R.J. Howard, J.A.K.; Puschmann, H. OLEX2: a complete structure solution, refinement and analysis program *J. Appl. Cryst.* **2009**, *42*, 339–341.
- [6] DIAMOND, Crystal and Molecular Structure Visualization Crystal Impact; Dr. H. Putz & Dr. K. Brandenburg GbR: Bonn, Germany, version 4.6.5, **2021**.
